# Supplementary material for: Computational estimation of potential inhibitors from known drugs against the main protease of SARS-CoV-2
Source: Royal Society of Chemistry journal article supplement (doi:10.1039/d1ra02529e), 2021-01-01
Supplement: d1ra02529e1.pdf [file d1ra02529e1.pdf]

## Supplementary Data

# Computational Estimation of Potential Inhibitors from the Known Drugs against the Main Protease of SARS-CoV-2

Nguyen Minh Tam<sup>a,b\*</sup>, Minh Quan Pham<sup>c,d</sup>, Nguyen Xuan Ha<sup>e</sup>, Pham Cam Nam,<sup>f</sup> Huong Thi Thu Phung<sup>g\*</sup>

<sup>a</sup>*Computational Chemistry Research Group, Ton Duc Thang University, Ho Chi Minh City, Vietnam. Email: [nguyenminhtam@tdtu.edu.vn](mailto:nguyenminhtam@tdtu.edu.vn)*

<sup>b</sup>*Faculty of Applied Sciences, Ton Duc Thang University, Ho Chi Minh City, Vietnam.*

<sup>c</sup>*Institute of Natural Products Chemistry, Vietnam Academy of Science and Technology, Hanoi, Vietnam*

<sup>d</sup>*Graduate University of Science and Technology, Vietnam Academy of Science and Technology, Hanoi, Vietnam*

<sup>e</sup>*Faculty of Chemistry and Environment, Thuyloi University, Ministry of Agriculture and Rural Development, Hanoi, Vietnam*

<sup>f</sup>*Department of Chemical Engineering, The University of Da Nang-University of Science and Technology, Da Nang City, Vietnam*

<sup>g</sup>*NTT Hi-Tech Institute, Nguyen Tat Thanh University, Ho Chi Minh City, Vietnam. Email: [ptthuong@ntt.edu.vn](mailto:ptthuong@ntt.edu.vn)*

### ZINC000169289767

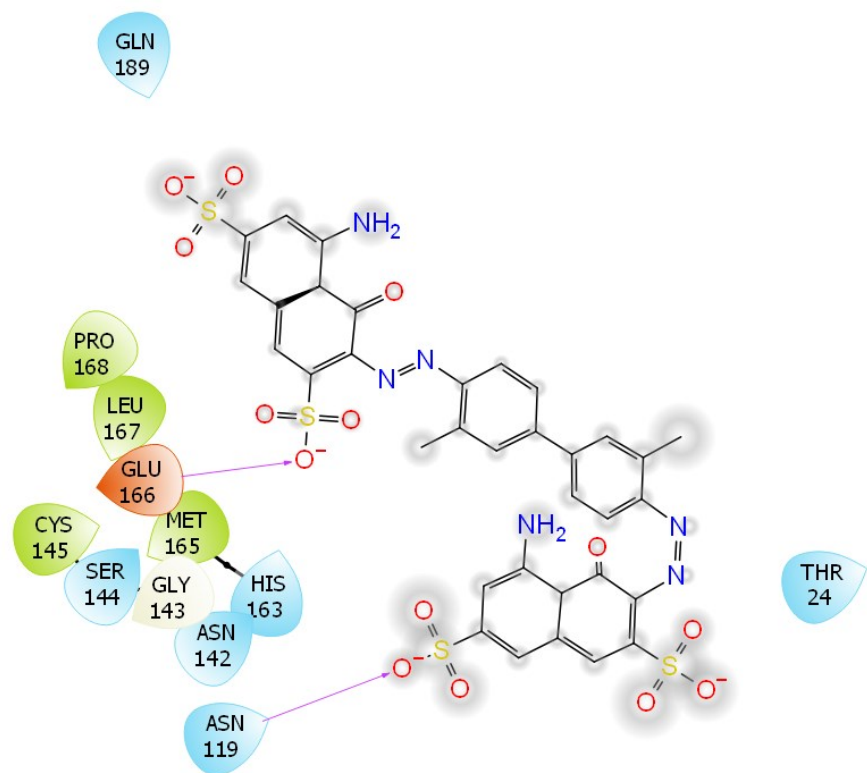

### ZINC000001612996

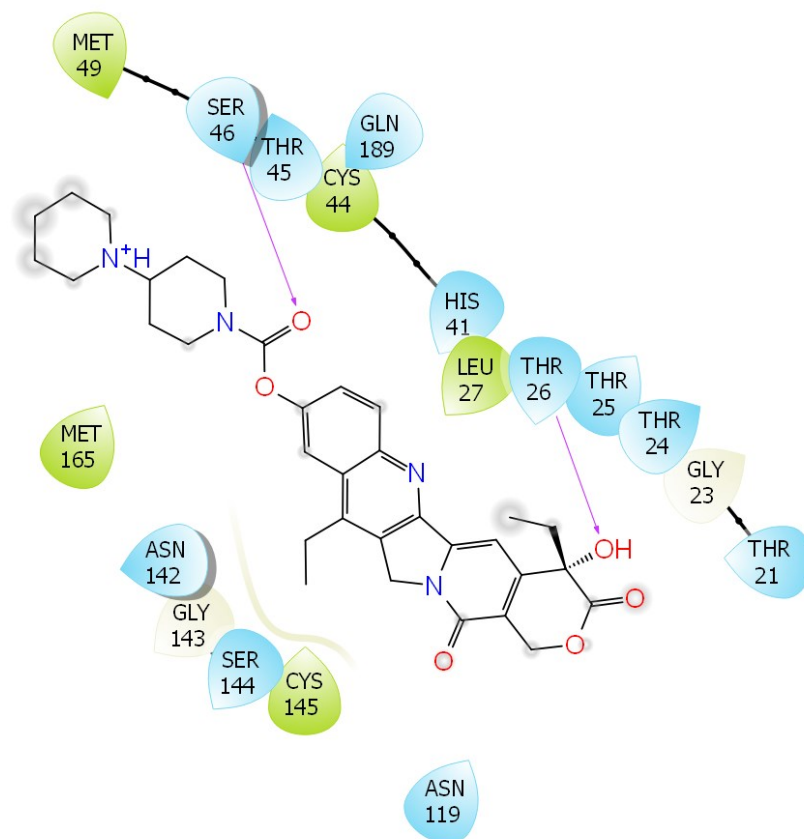

### ZINC00000896717

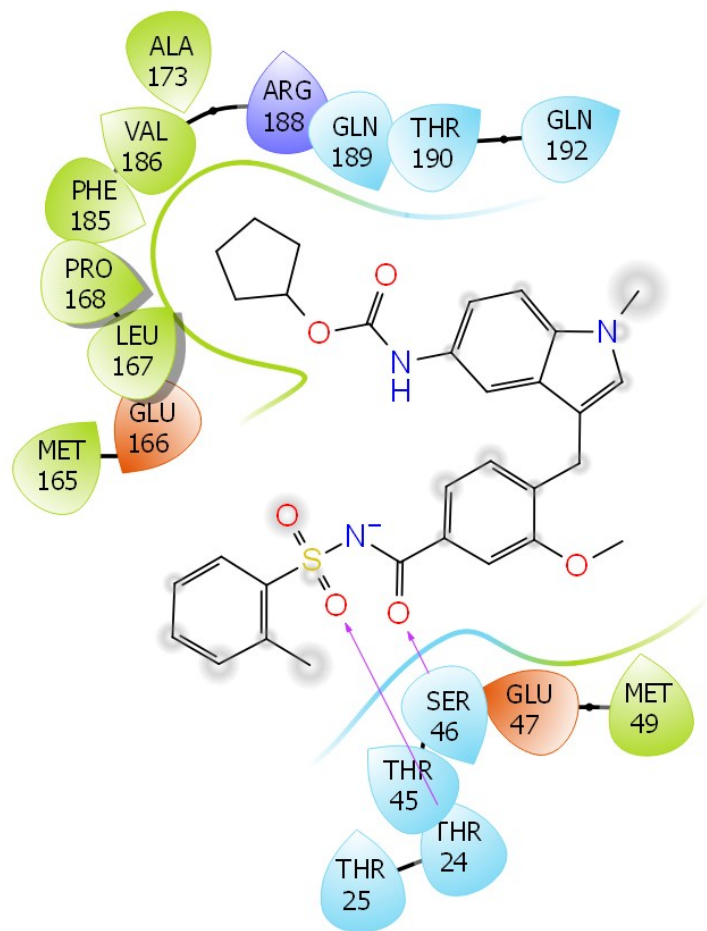

### ZINC000003978005

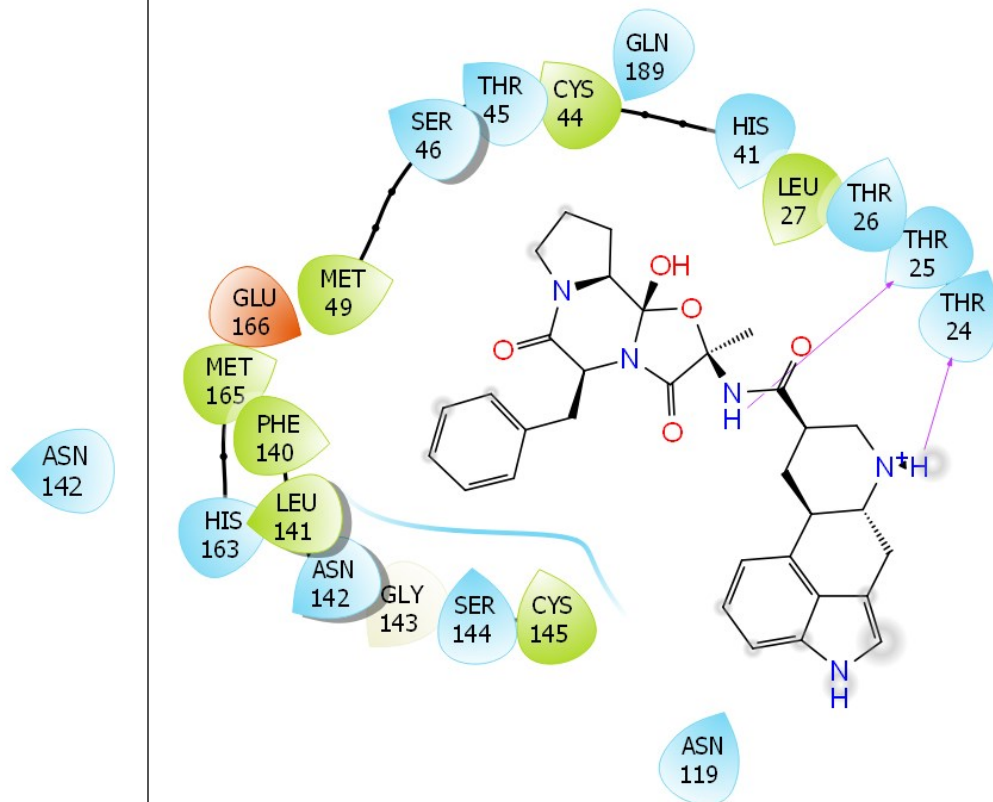

### ZINC000008101127

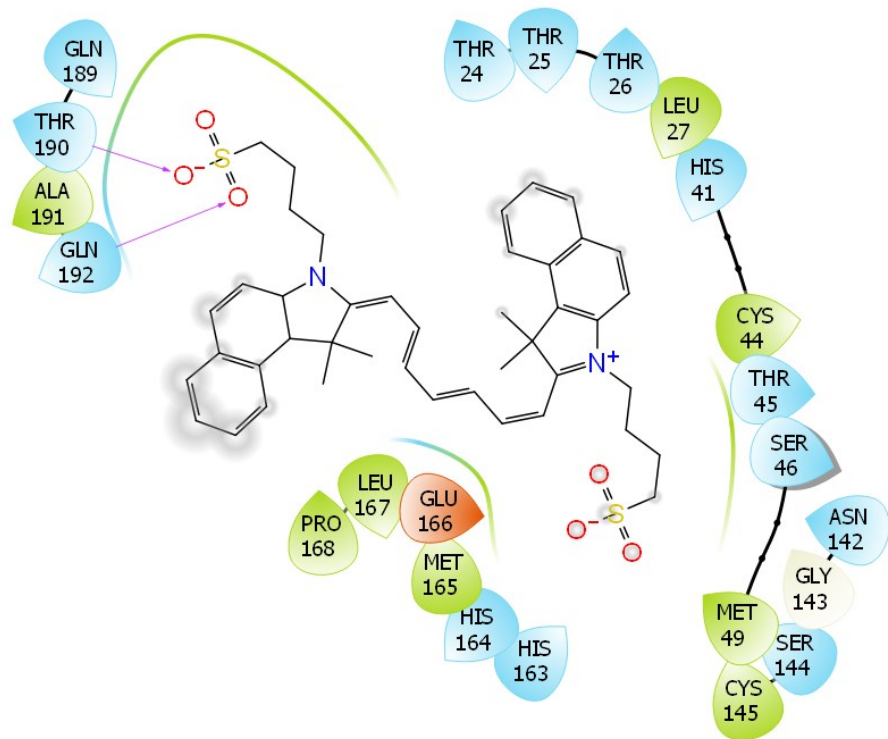

### ZINC000006716957

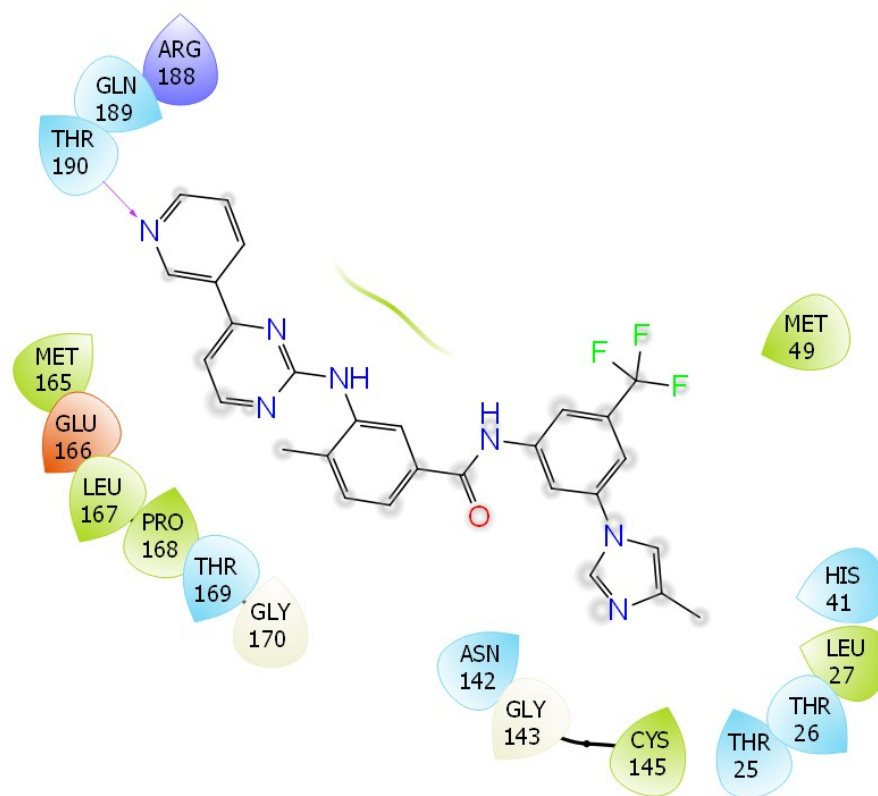

### ZINC000064033452

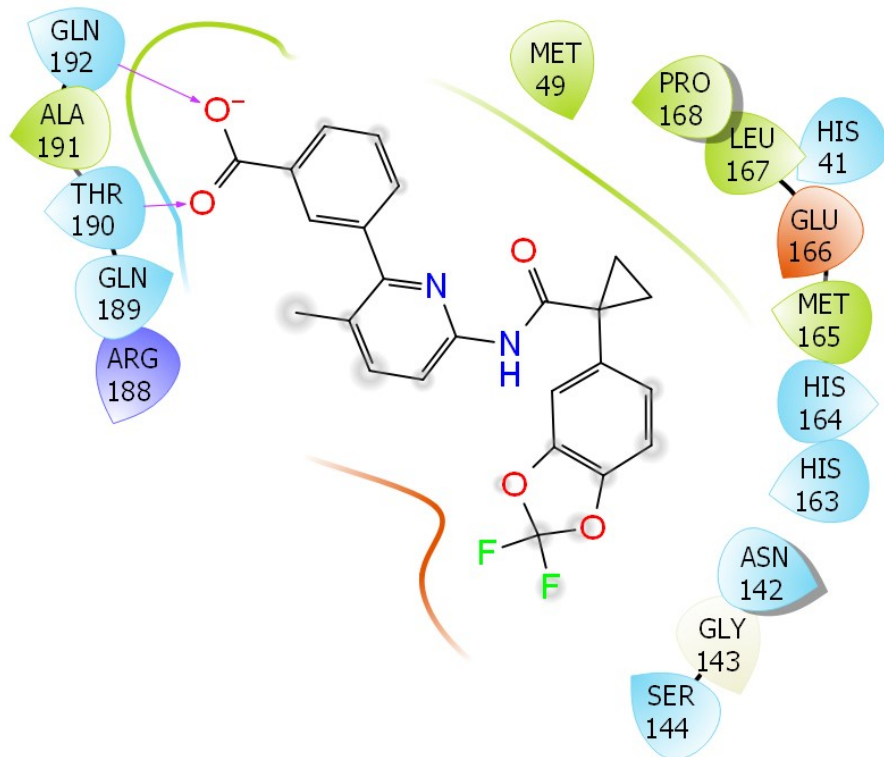

### ZINC000164528615

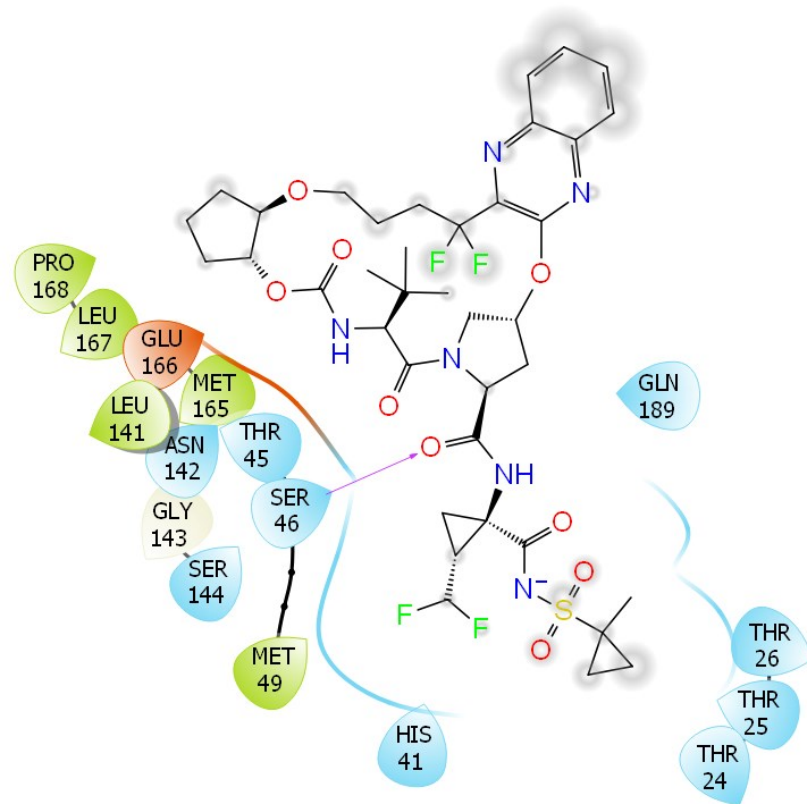

### ZINC000052955754

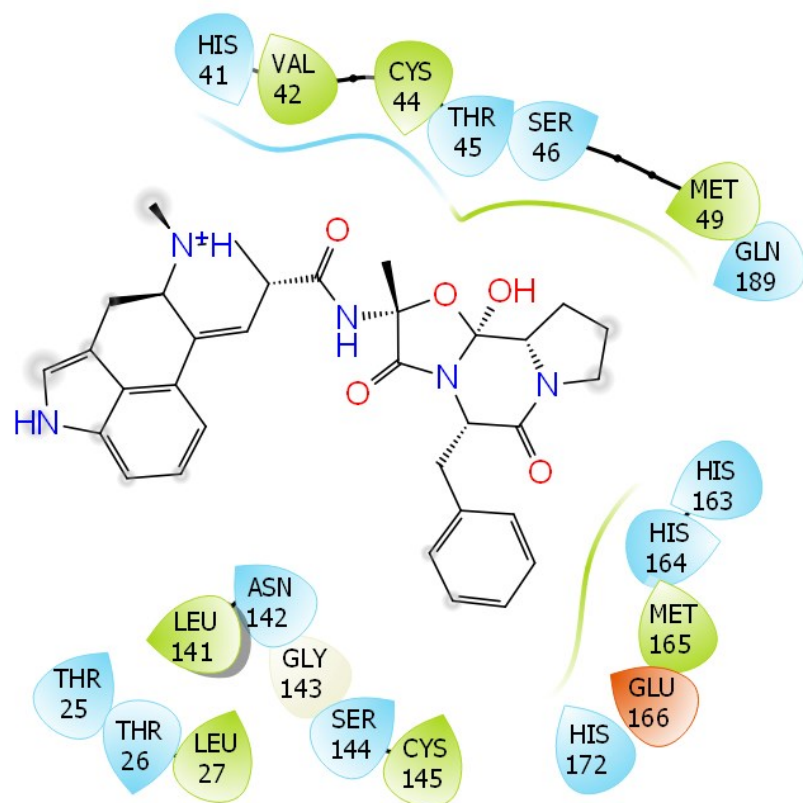

### ZINC000004099009

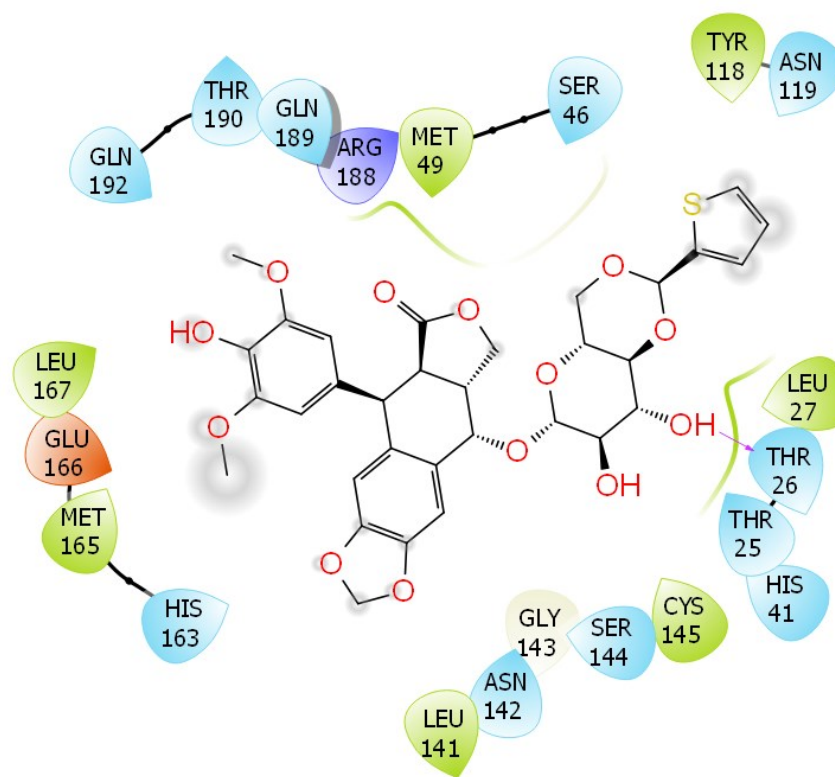

### ZINC00006745272

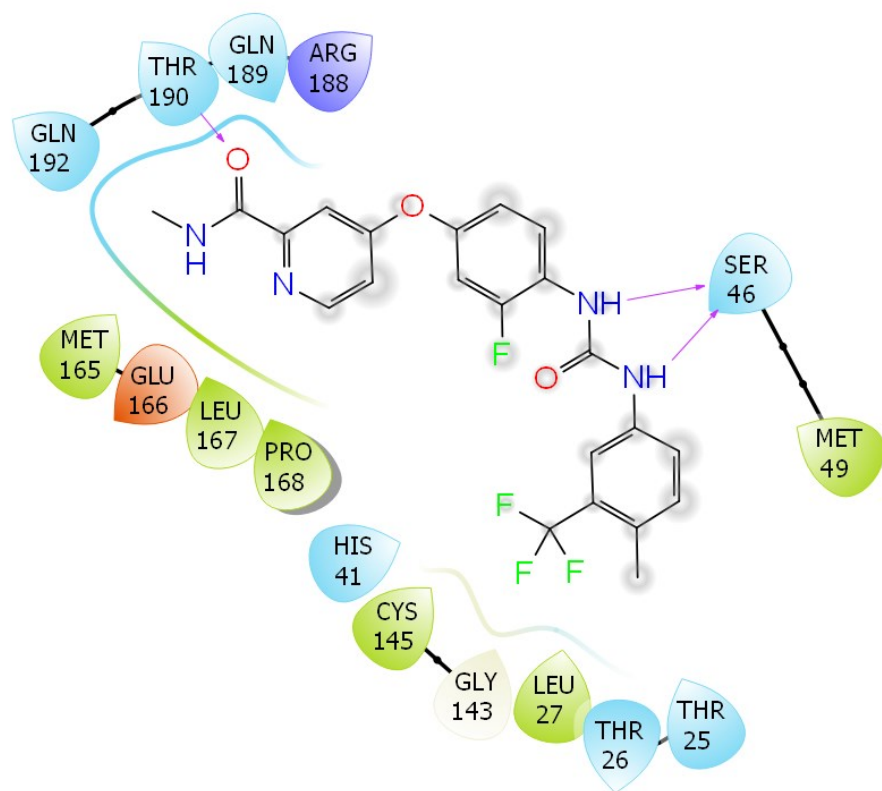

### ZINC000084668739

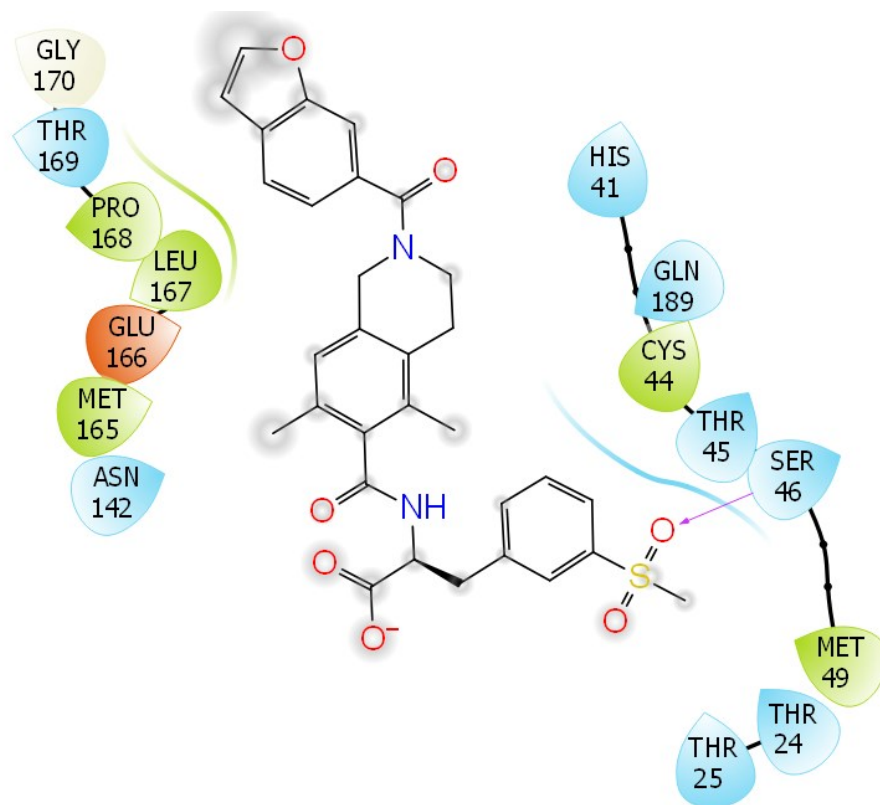

### ZINC00019632618

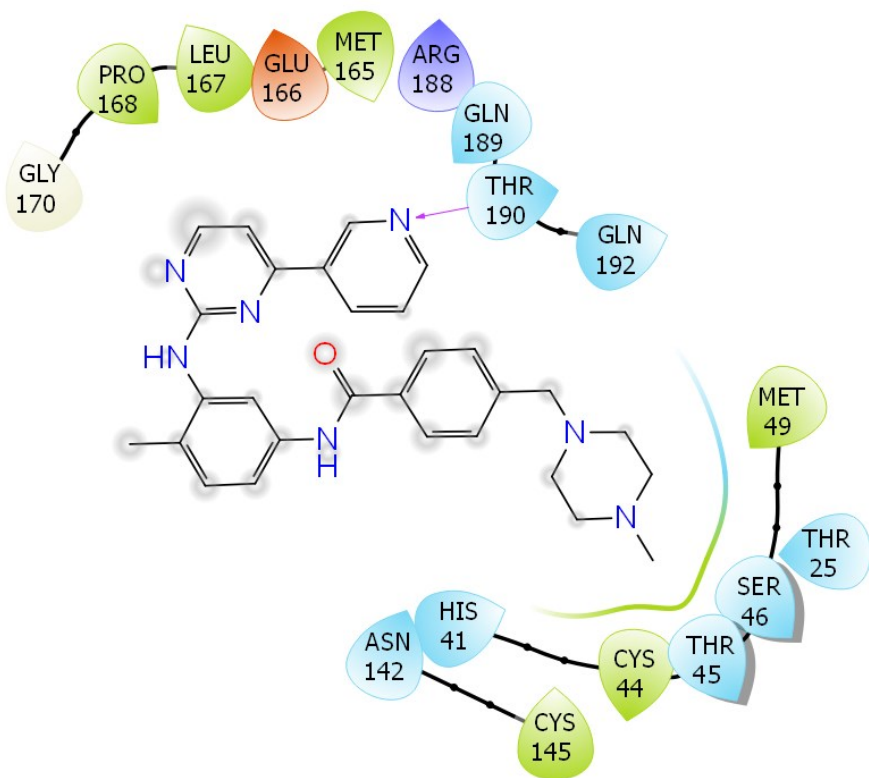

### ZINC000169621200

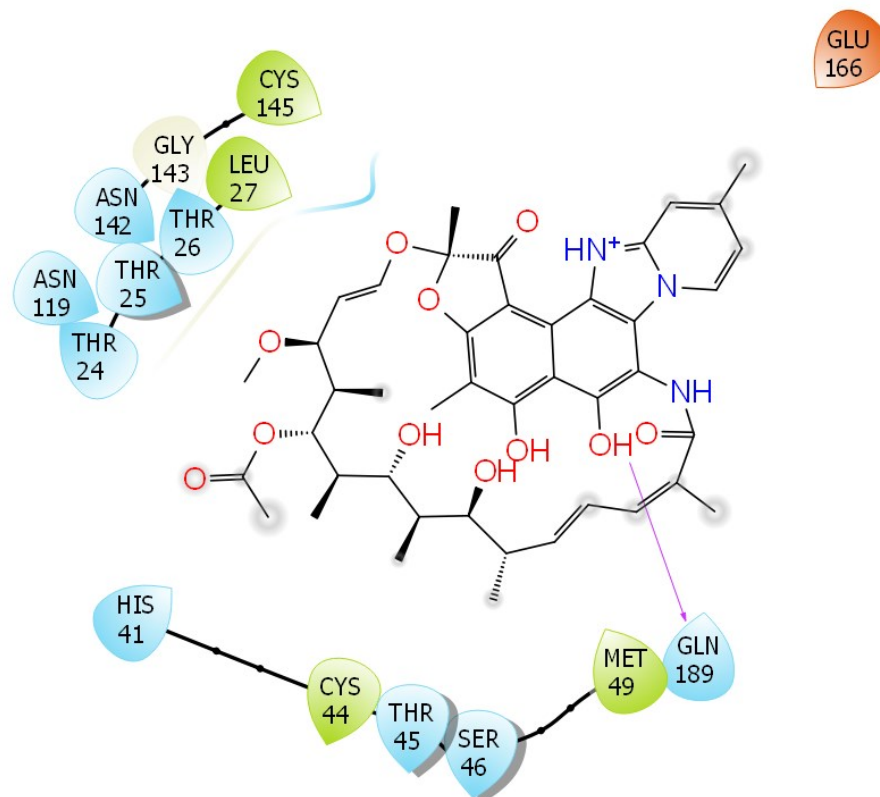



### ZINC000100378061

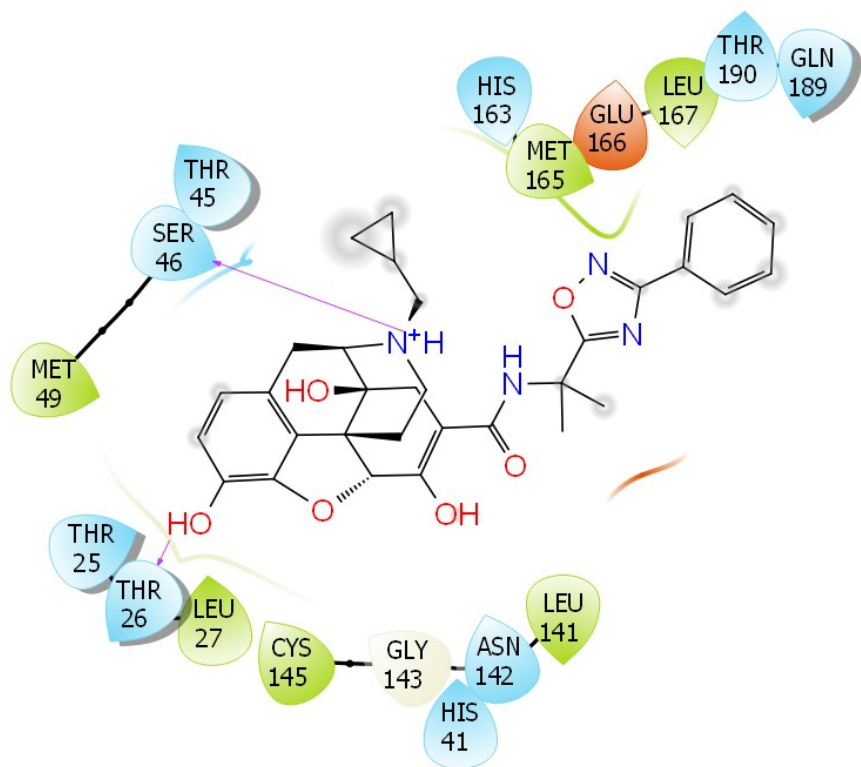

### ZINC000014210642

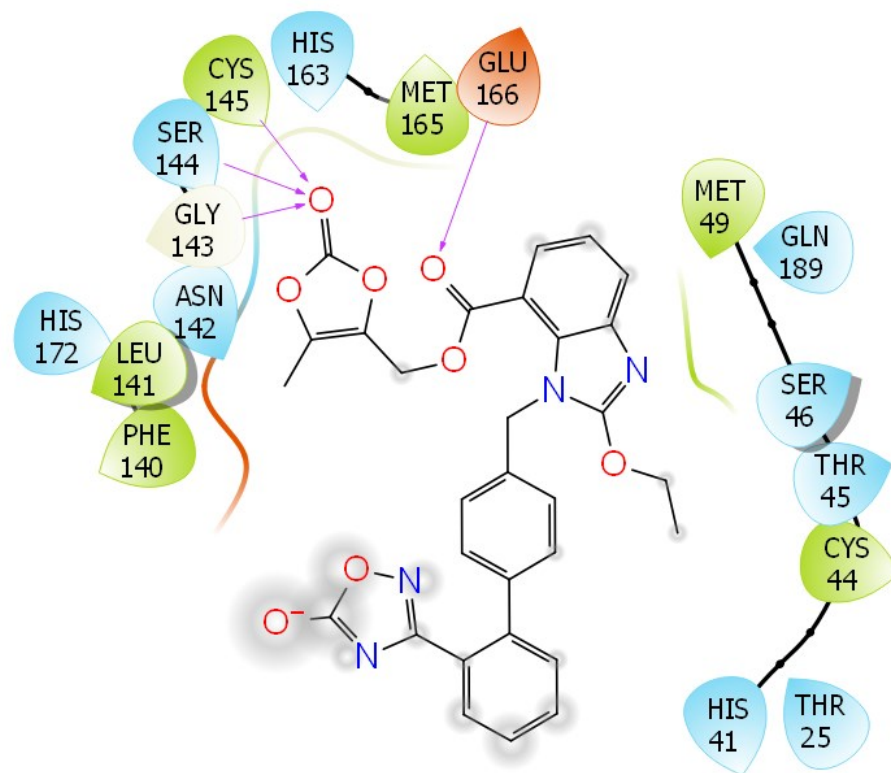

### ZINC000058581064

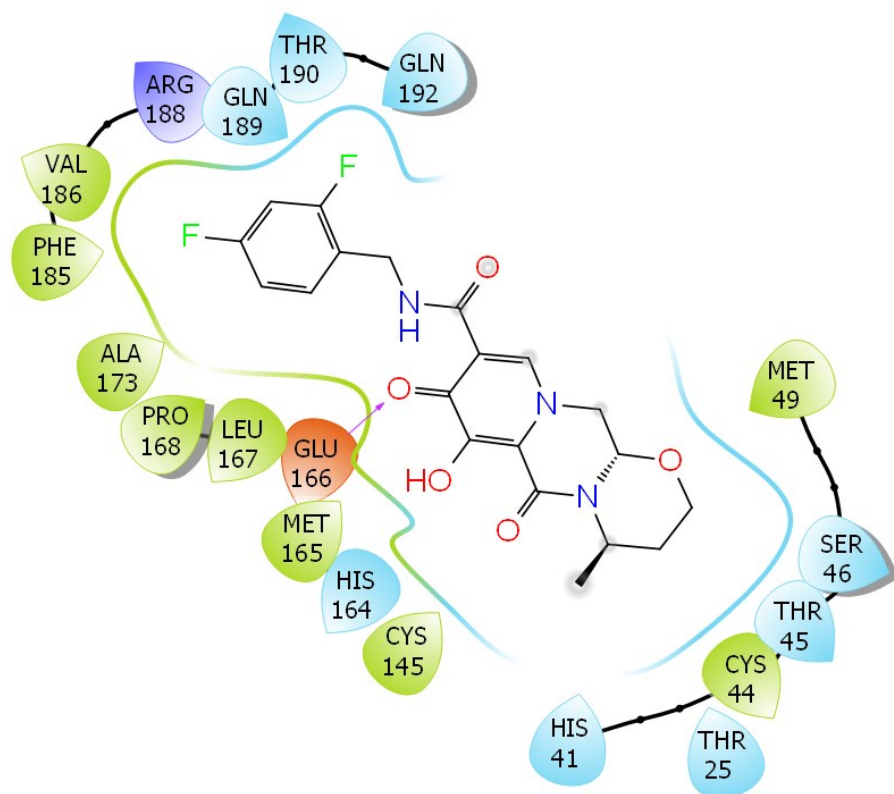

### ZINC000003989268

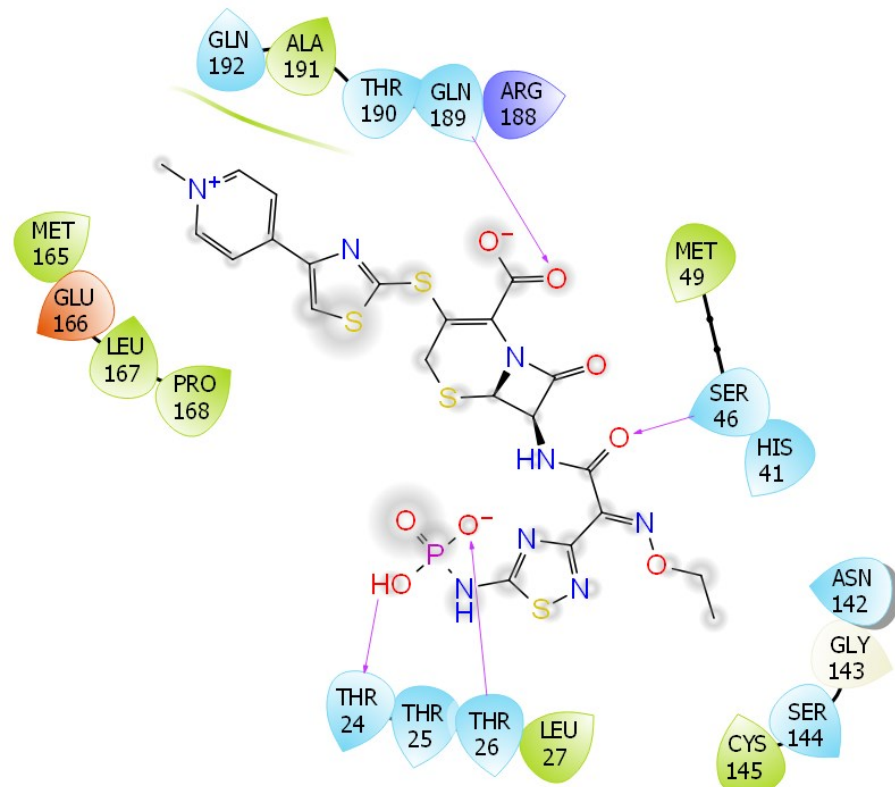

### ZINC000029416466

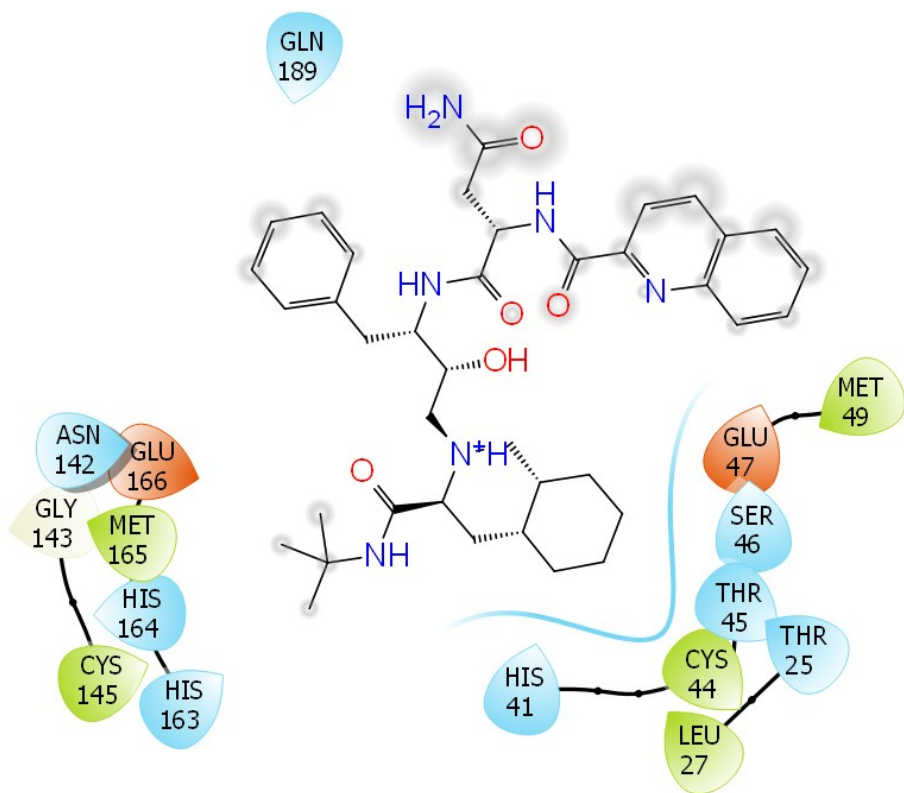

### ZINC000068204830

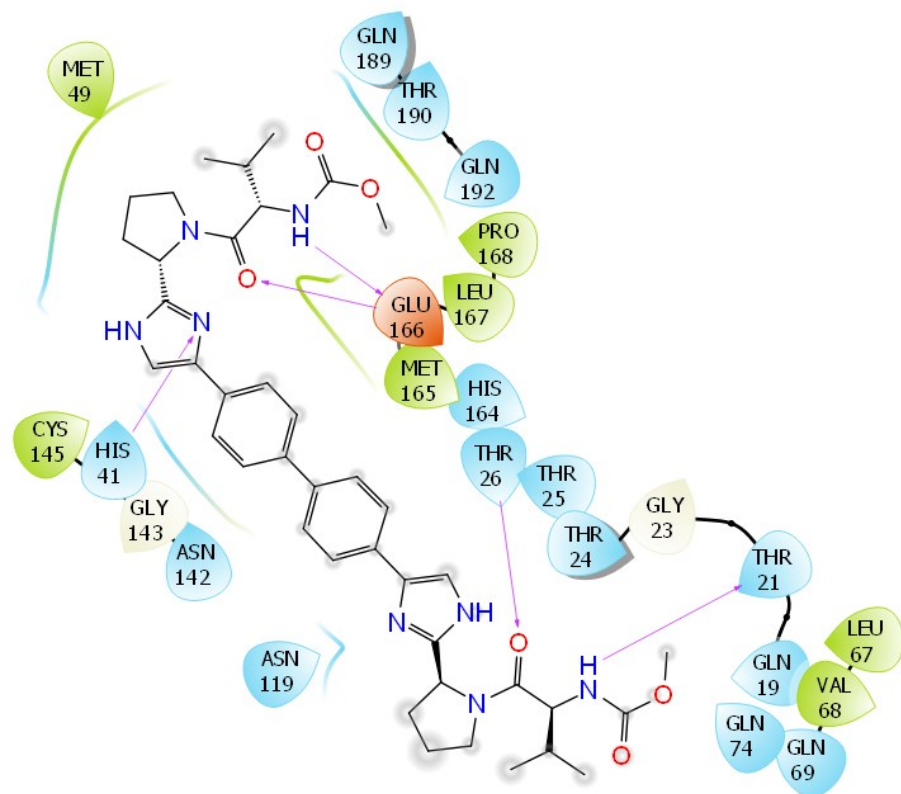

### ZINC000070466416

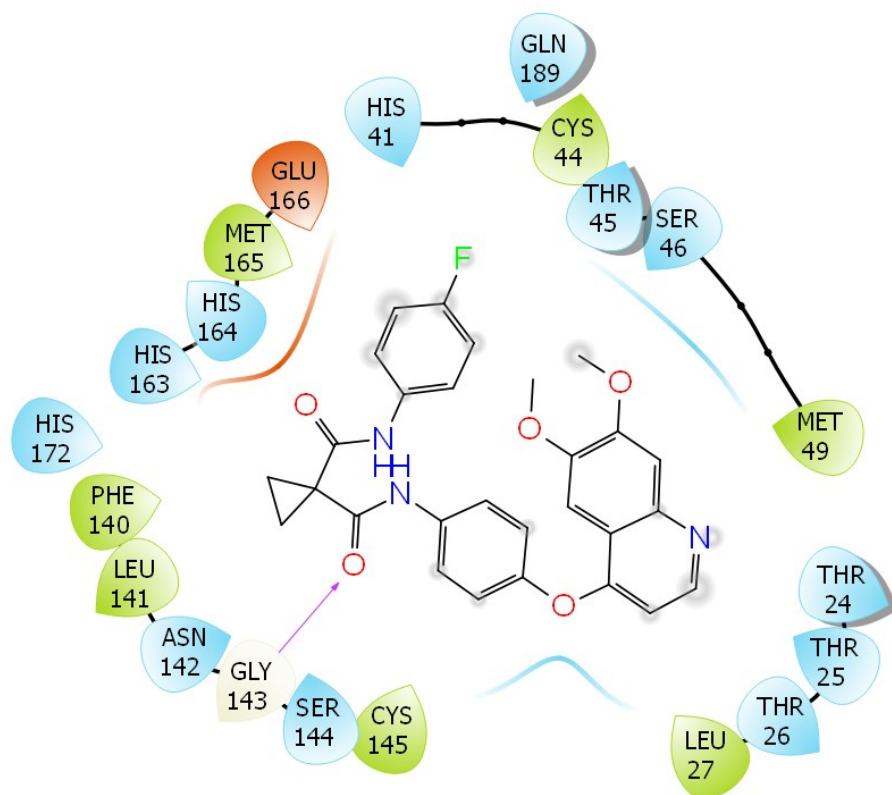

### ZINC000013831130

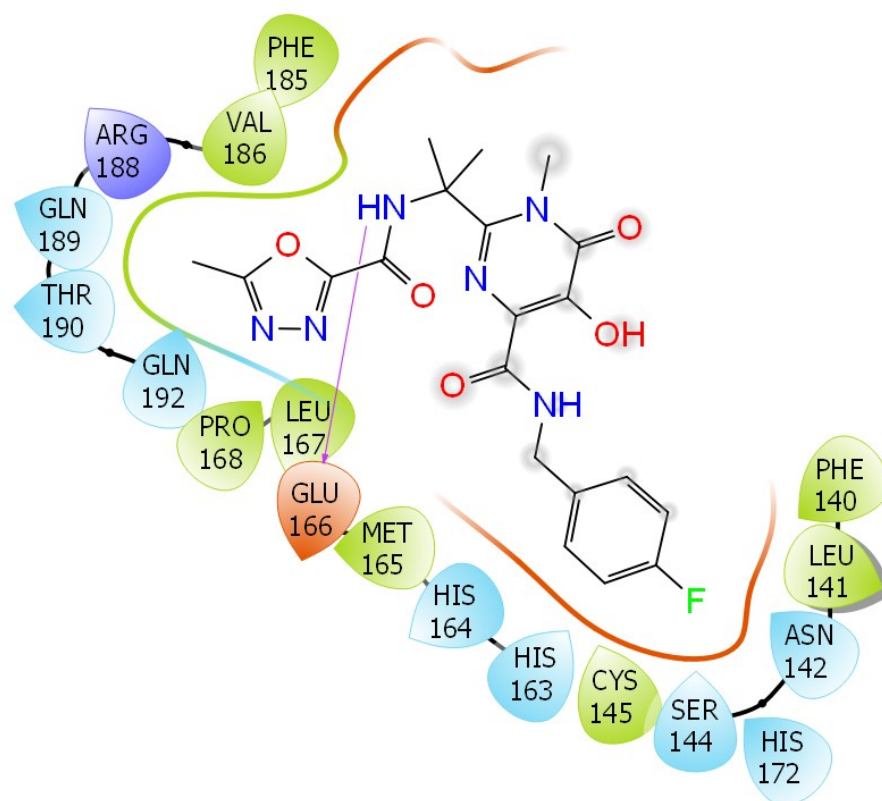

### ZINC000094566092

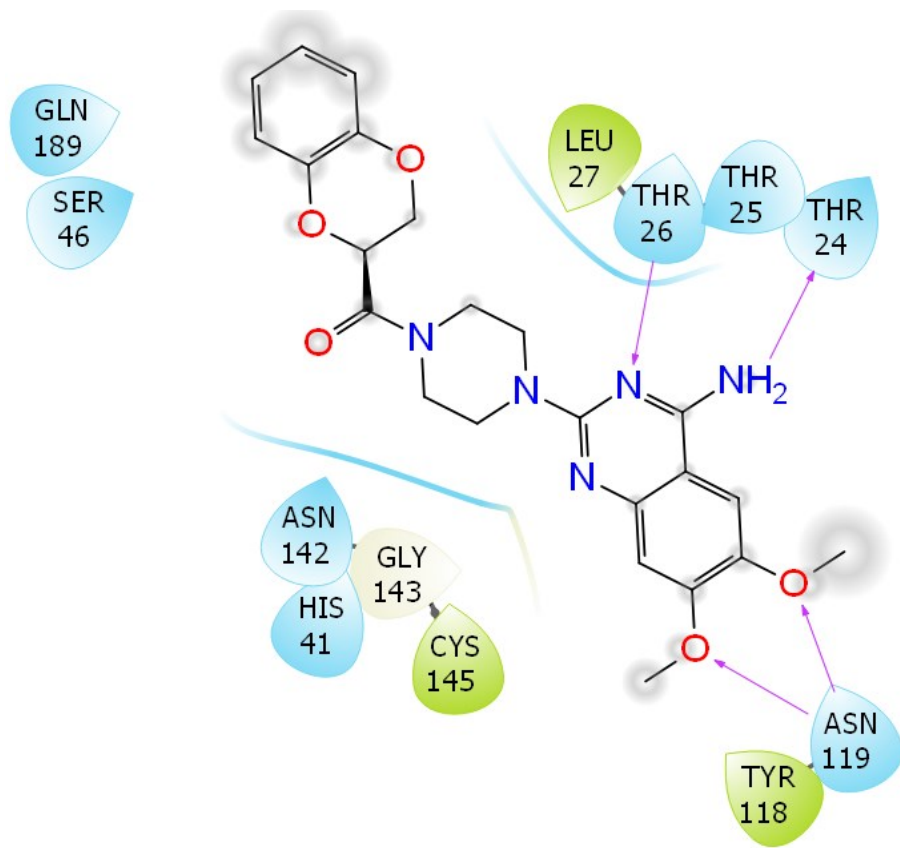

### ZINC00009212427

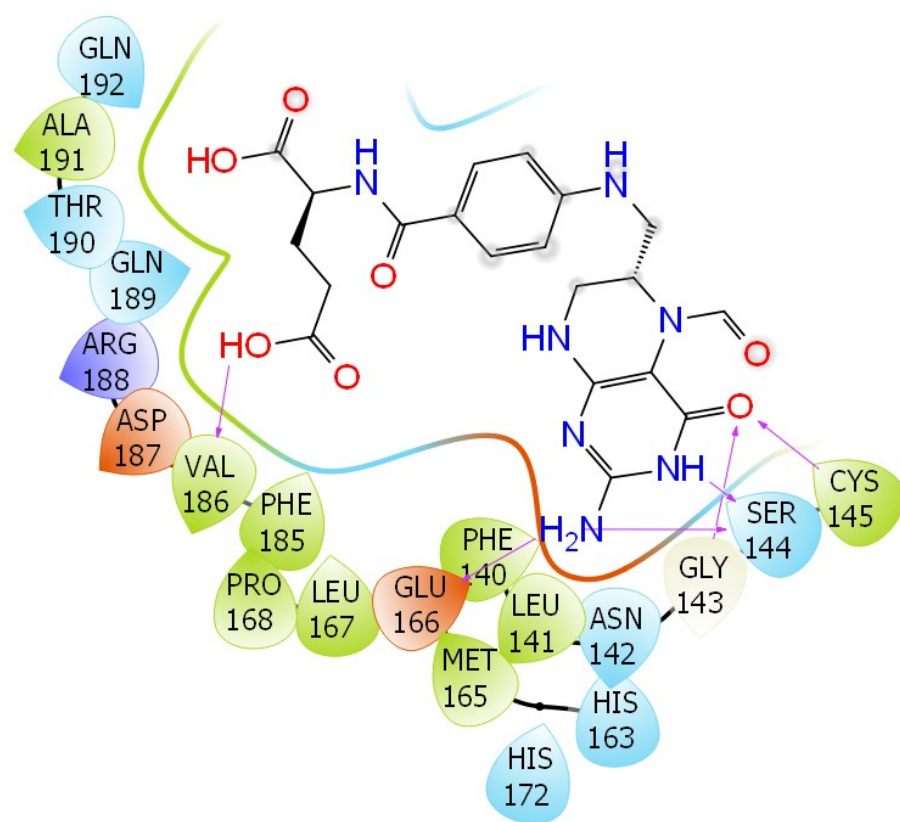

ZINC000003938684

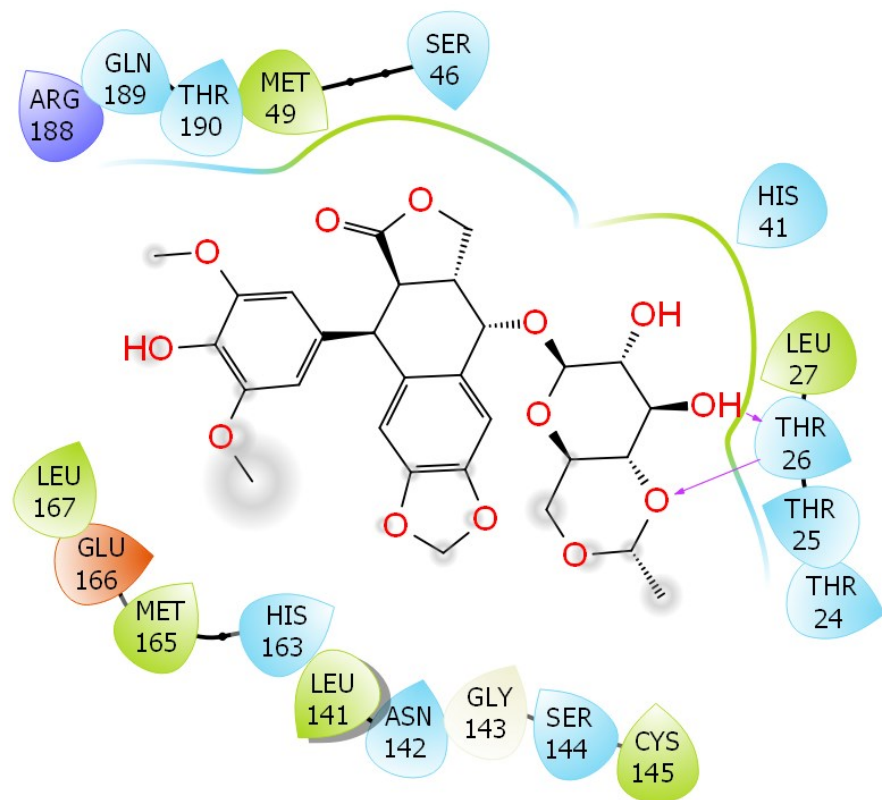

ZINC000003932831

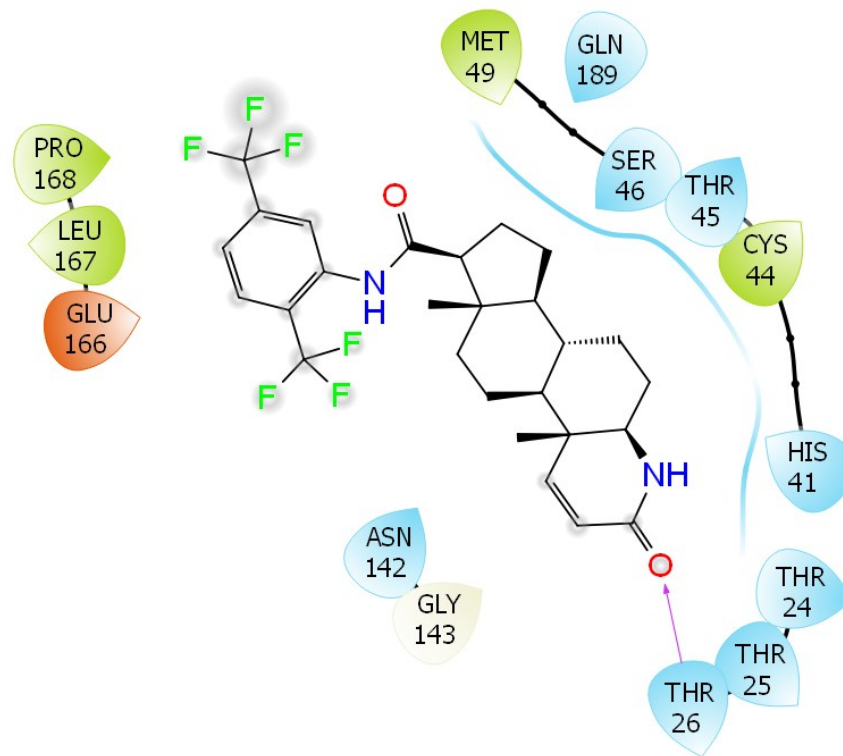

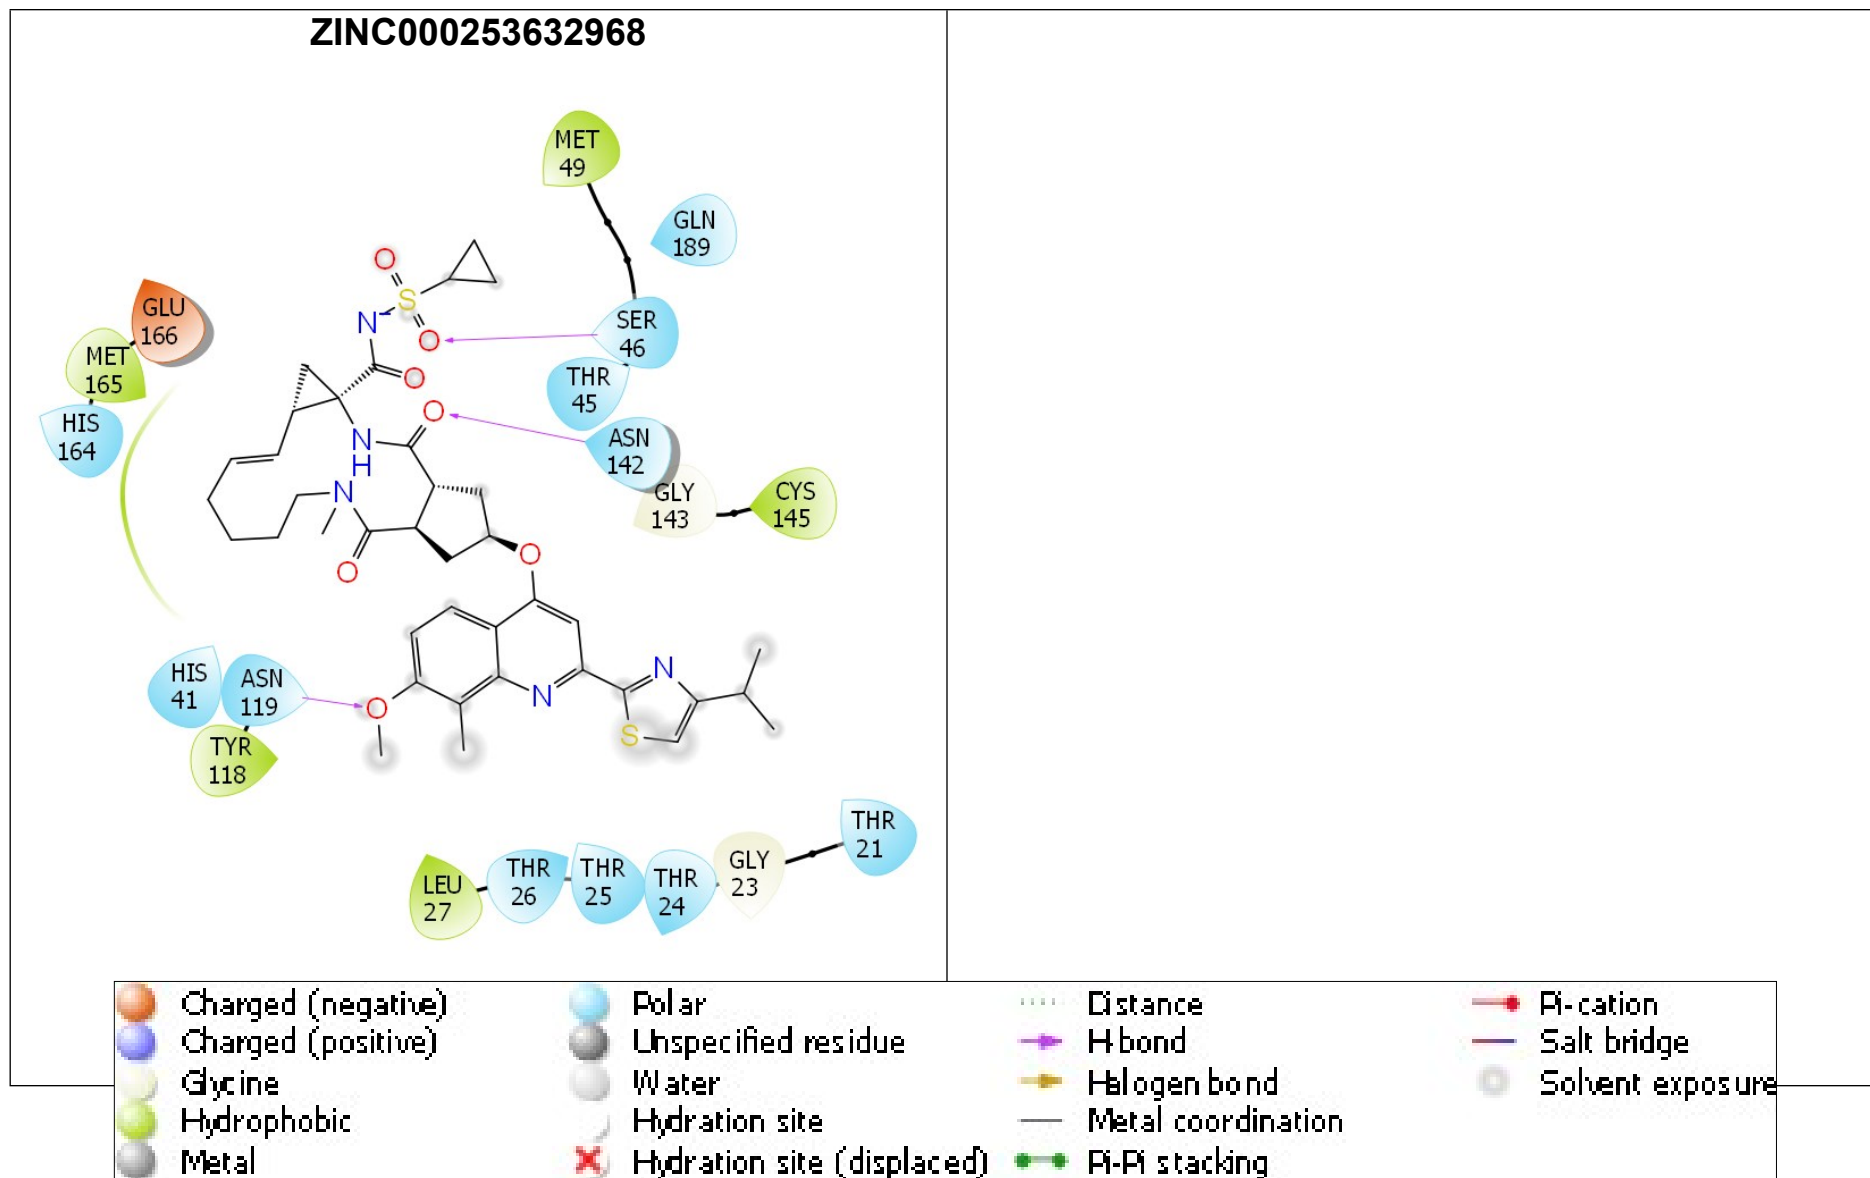

**Figure S1. The detailed interaction of SARS-CoV-2 Mpro and the full top-lead compounds**

The results are illustrated by the molecular modeling software Maestro, Schrödinger. Hydrogen bonds formed by residues of SARS-CoV-2 Mpro and ligands are indicated by purple arrows. Atoms of carbon, oxygen, nitrogen, and sulfur are presented in black, red, blue, and yellow, respectively.

ZINC000169289767

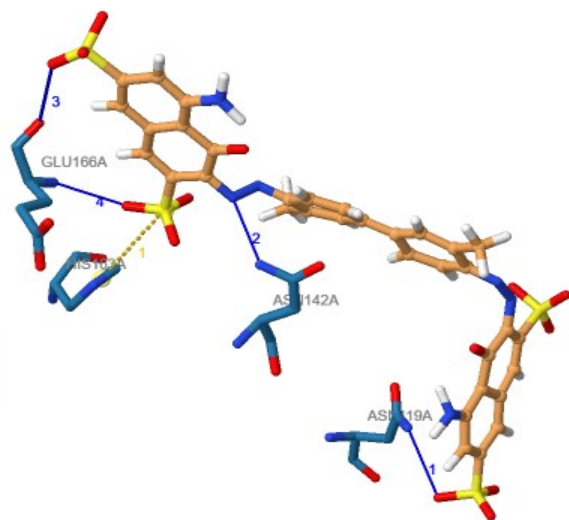

ZINC000001612996

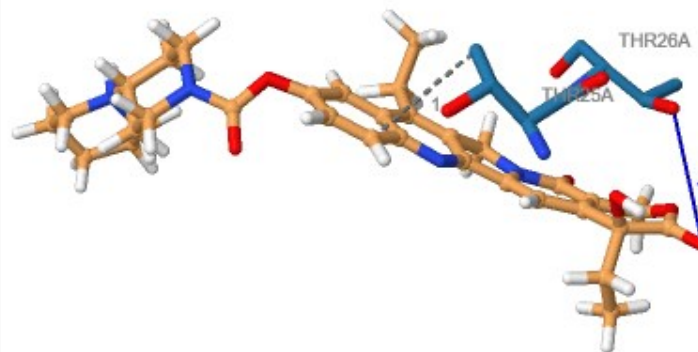

ZINC000000896717

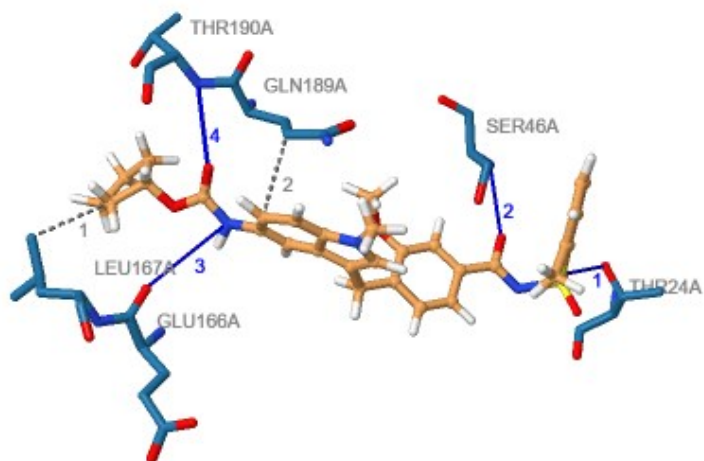

ZINC000003978005

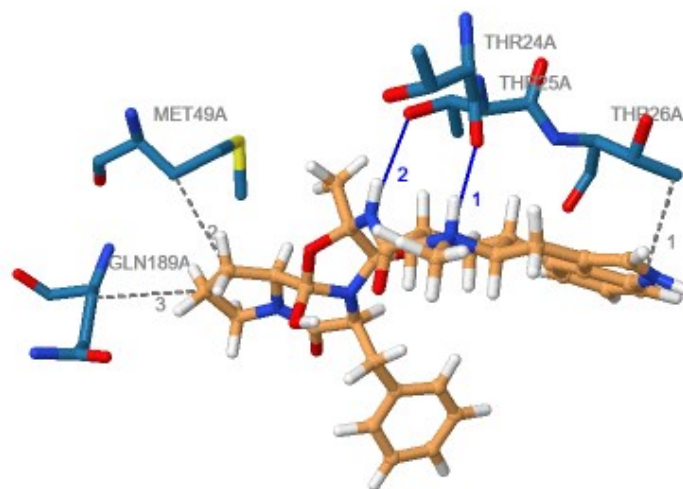



ZINC000008101127

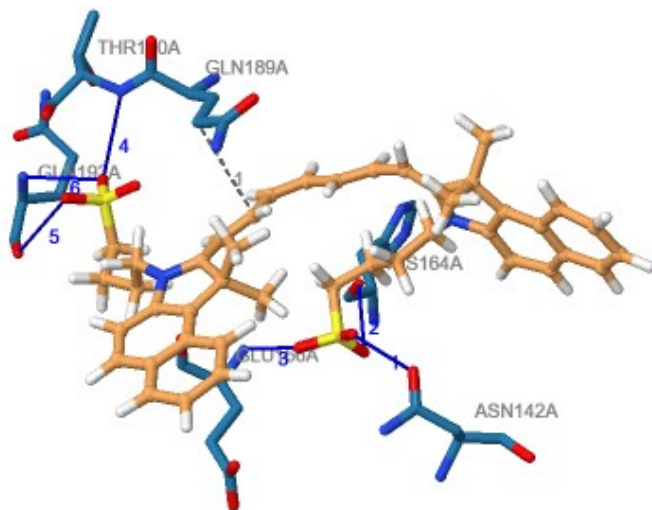

ZINC000006716957

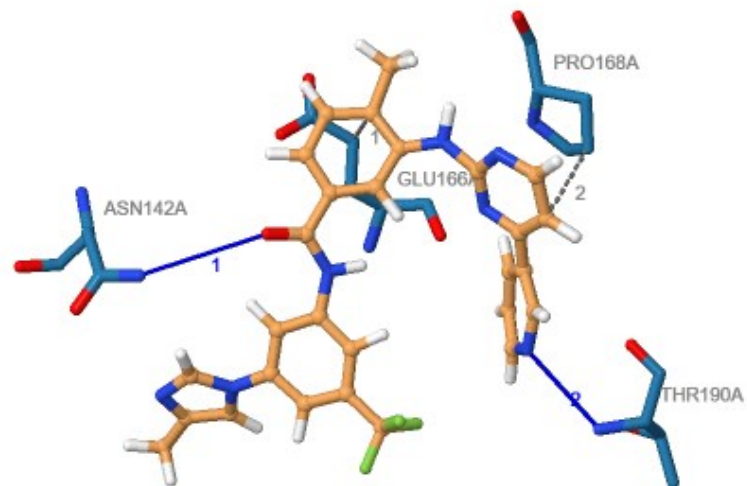

ZINC000064033452

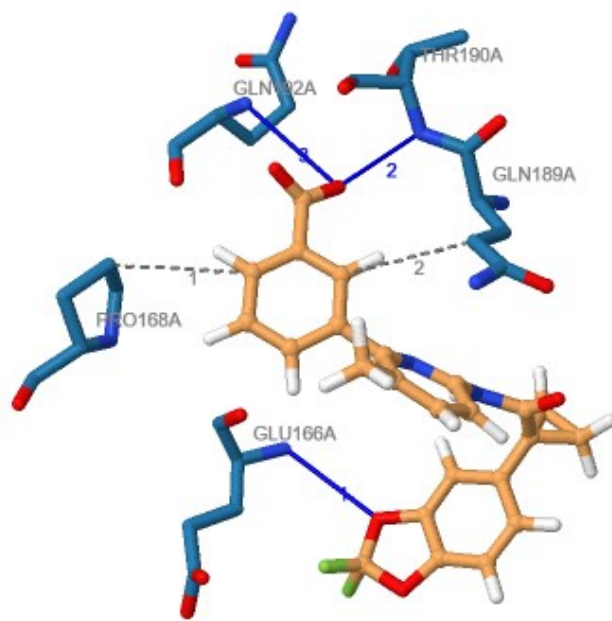

ZINC000164528615

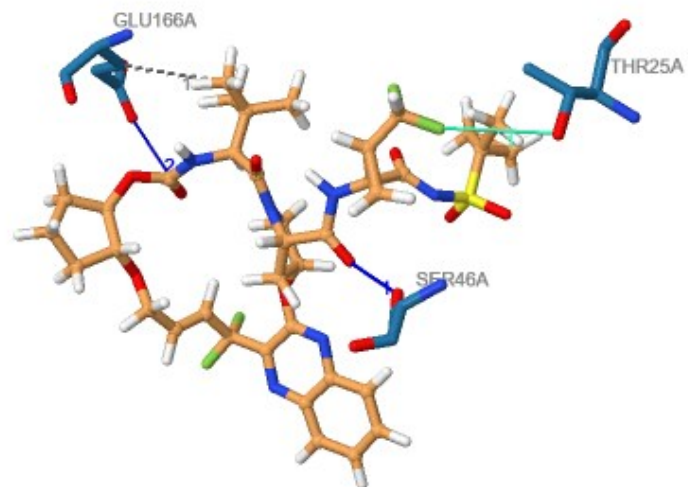

ZINC000052955754

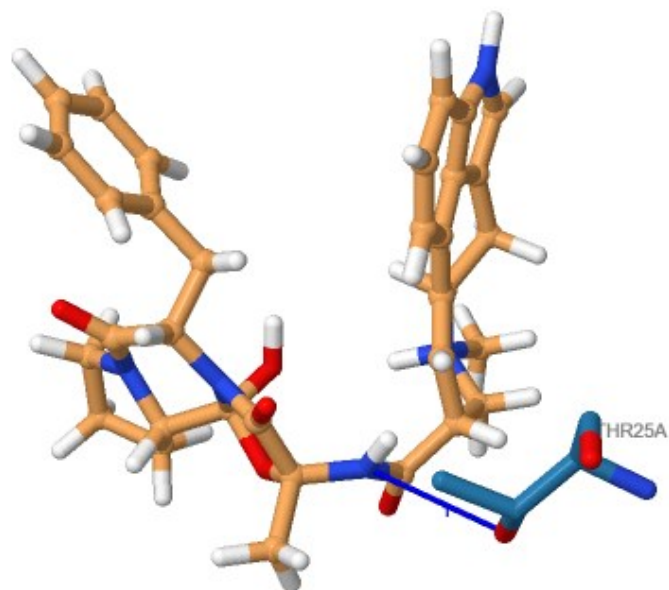

ZINC000004099009

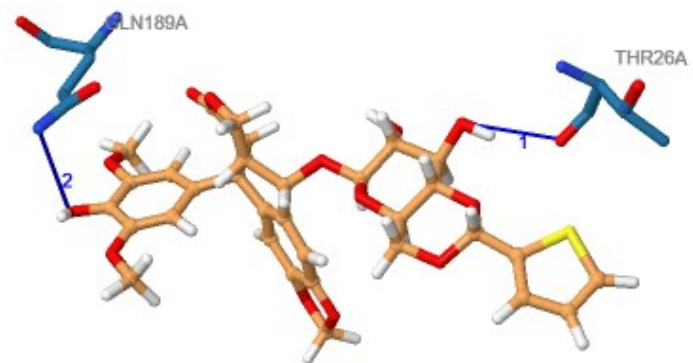

ZINC000006745272

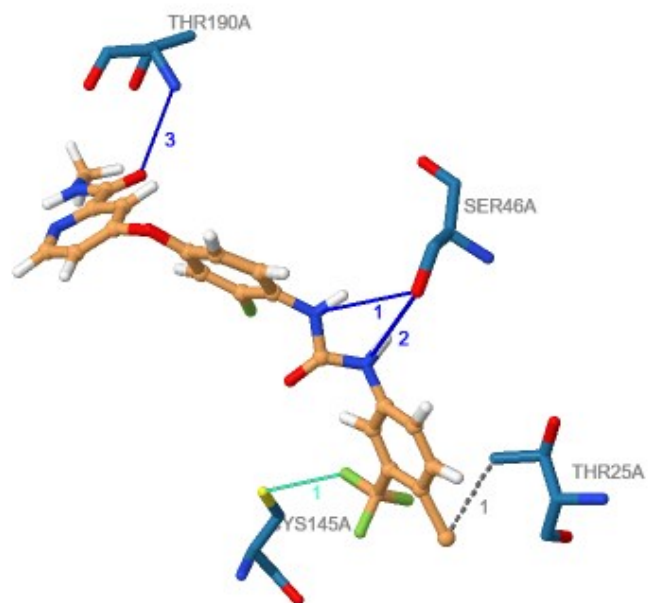

ZINC000084668739

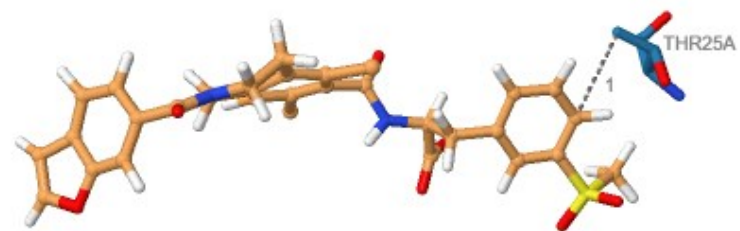

ZINC00019632618

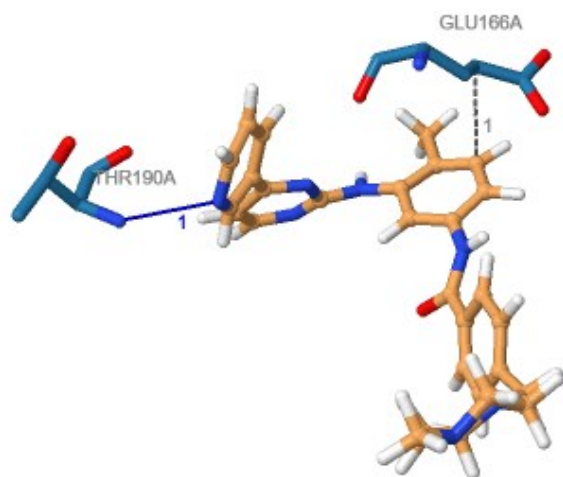

ZINC000169621200

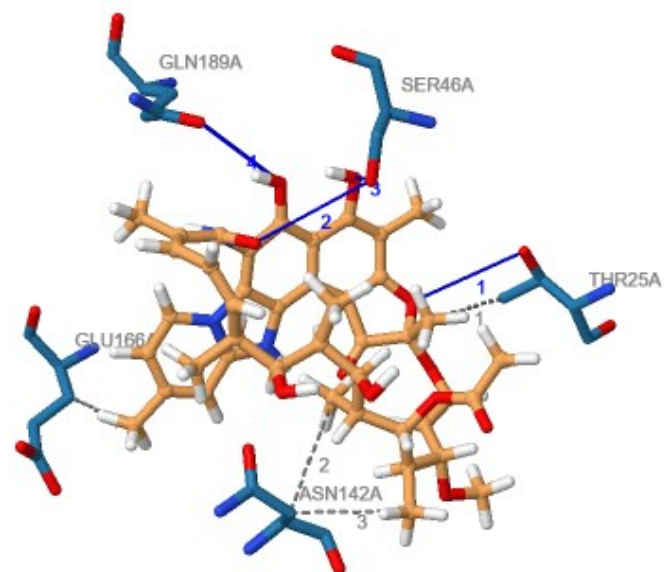

ZINC000100378061

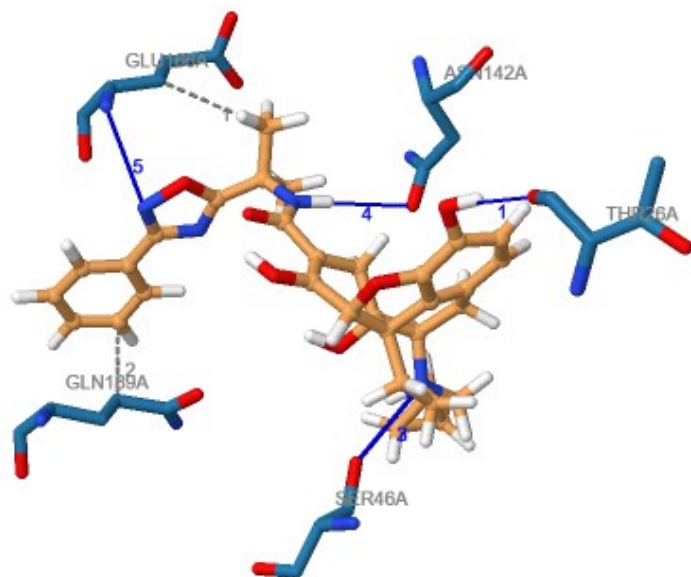

ZINC000014210642

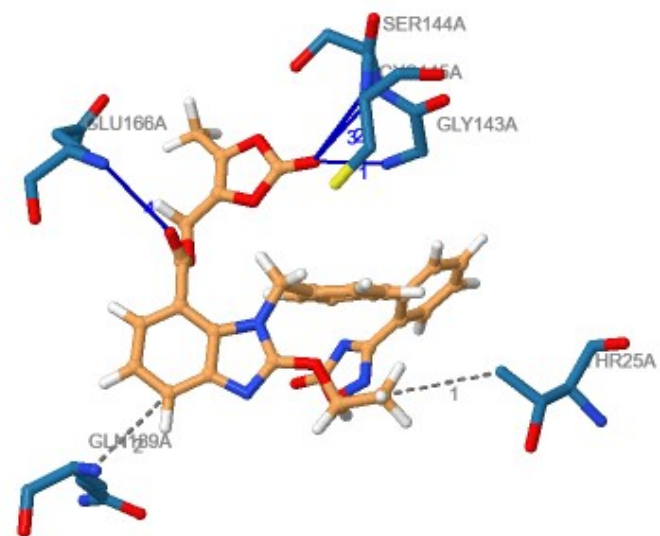

ZINC000058581064

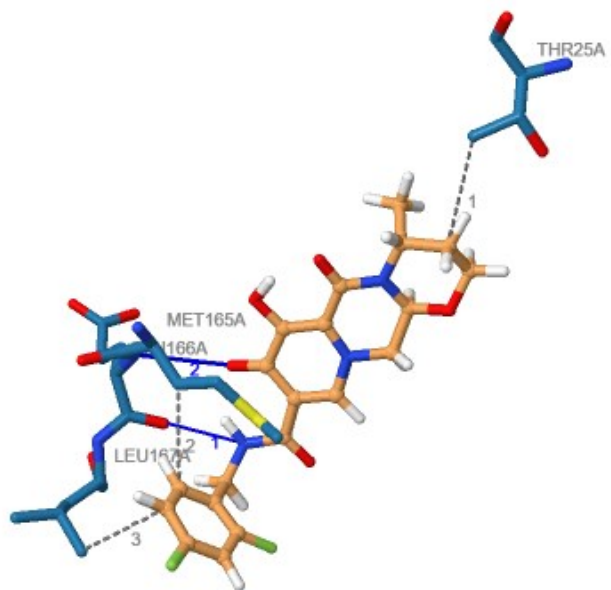

ZINC000003989268

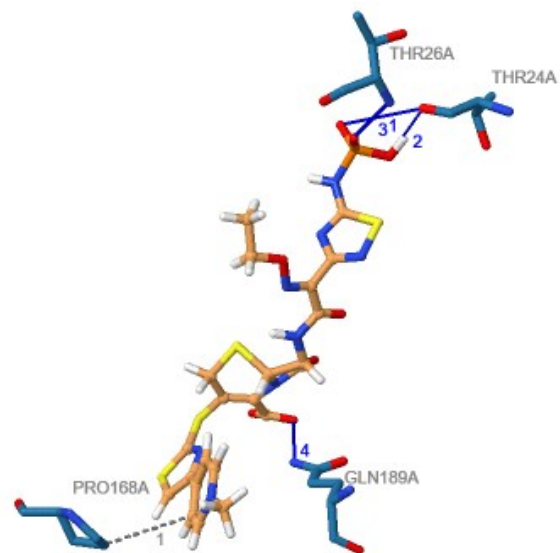

ZINC000029416466

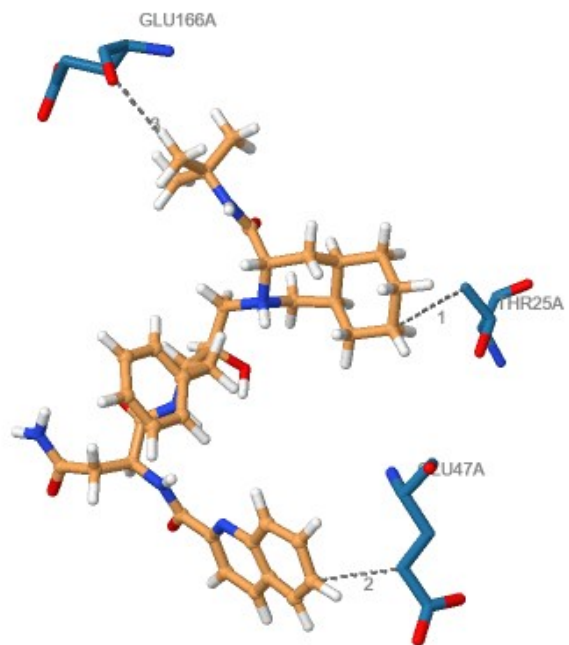

ZINC000068204830

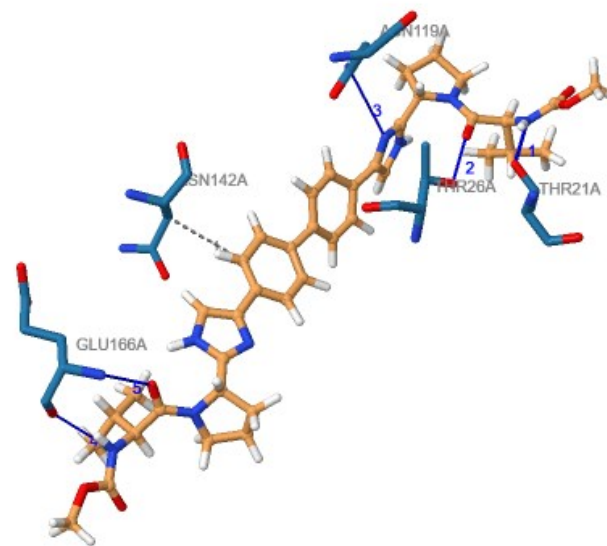

**ZINC000070466416**

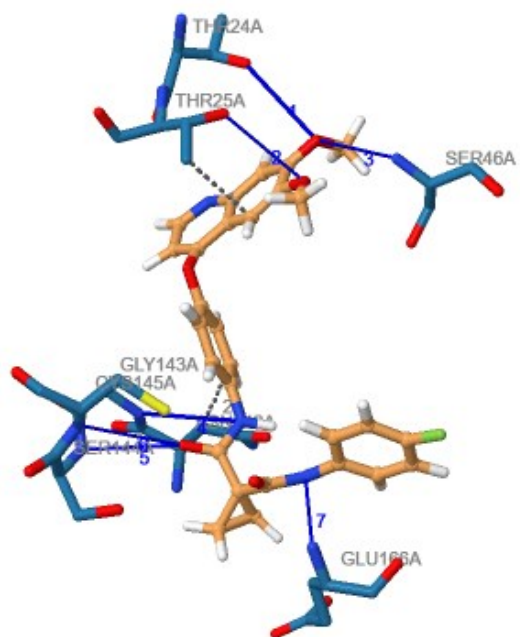

**ZINC000013831130**

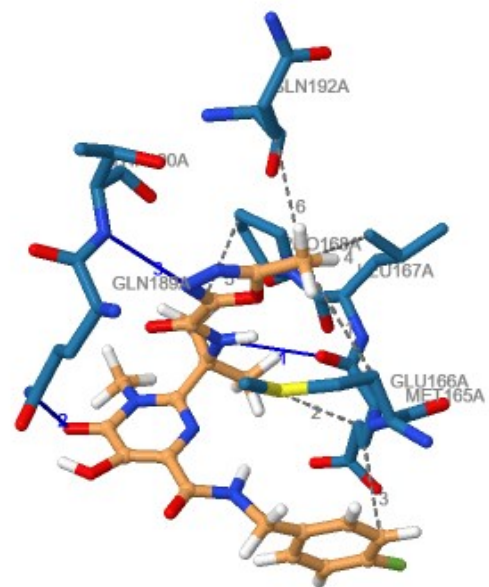

**ZINC000094566092**

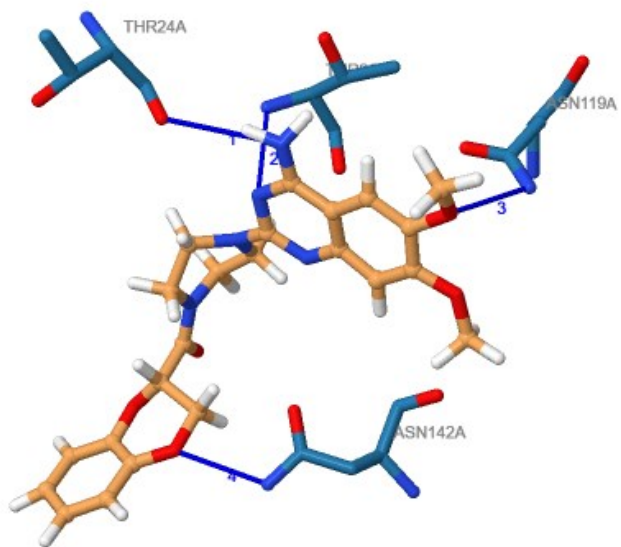

**ZINC000009212427**

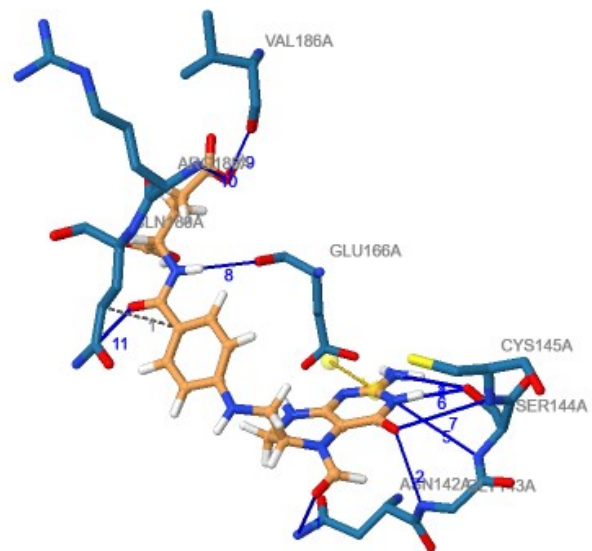

ZINC000003938684

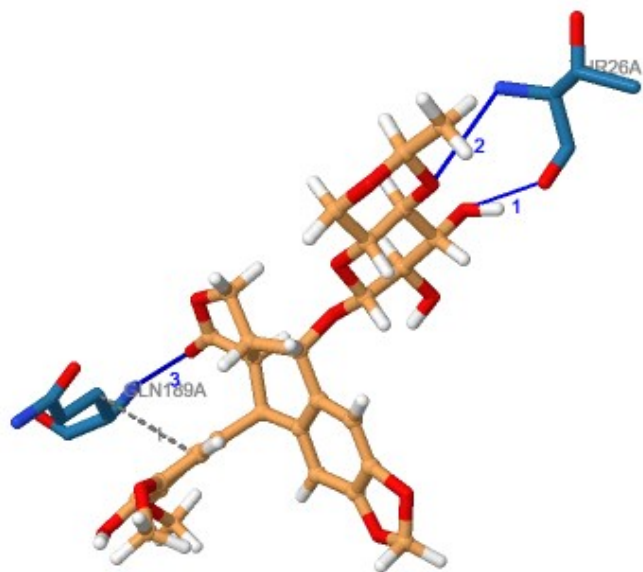

ZINC000003932831

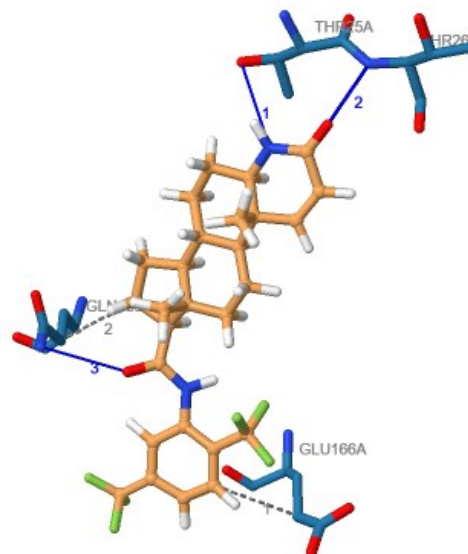

ZINC000253632968

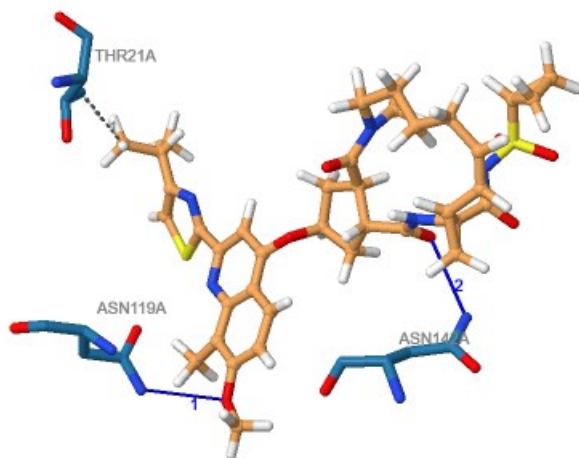

**Figure S2. The dominant conformation of the top-lead compounds in the complex with SARS-CoV-2 Mpro**

The result was obtained by all-atom clustering with a cut-off of 0.3 nm over the last NPT. Blue and green lines indicate hydrogen and halogen bonds between the ligand and the residues of SARS-CoV-2 Mpro, respectively. Grey and yellow dots indicate hydrophobic interactions and salt bridges between the ligand and the residues of SARS-CoV-2 Mpro, respectively. The figure was generated using a PLIP web service.<sup>1</sup>

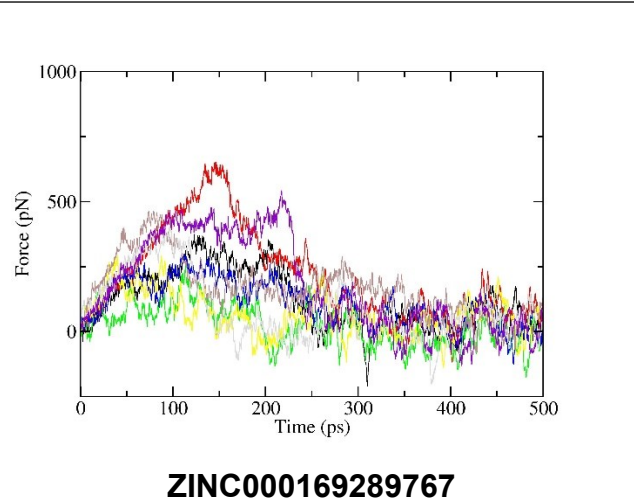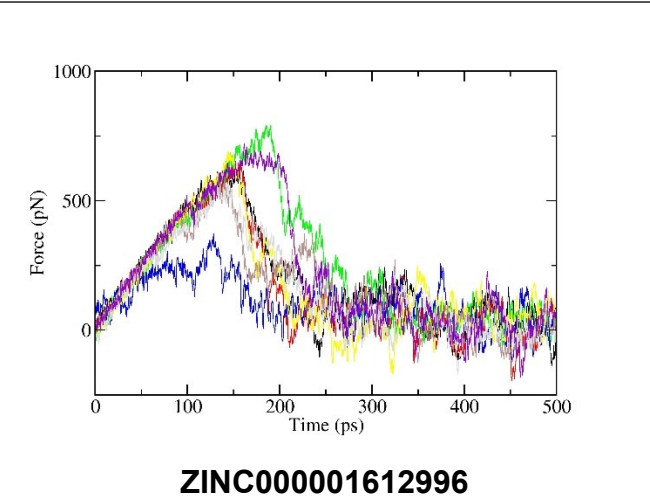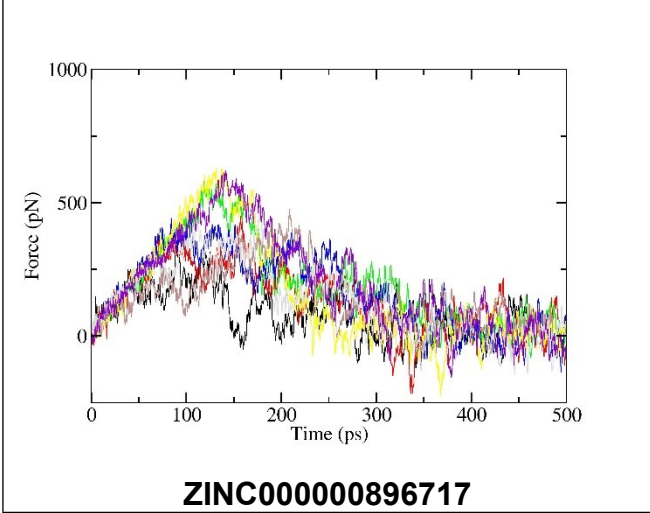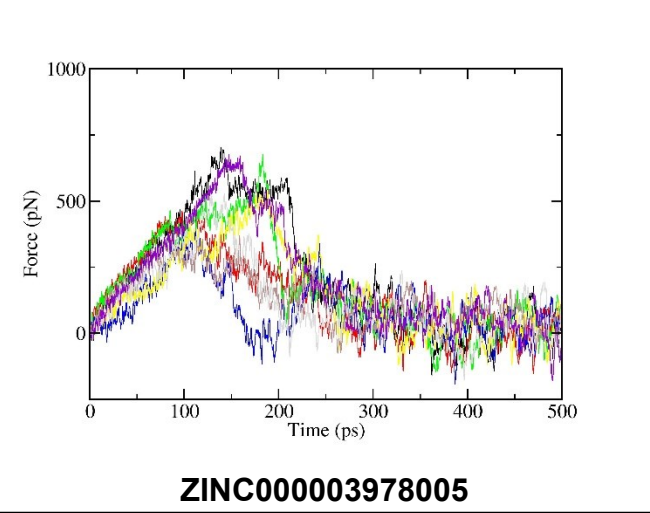

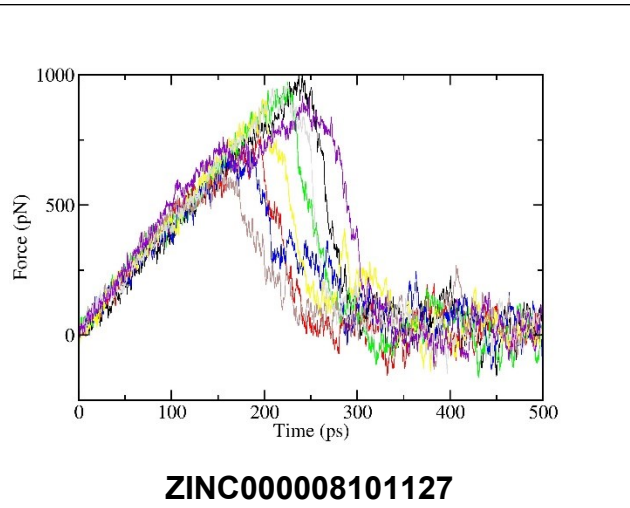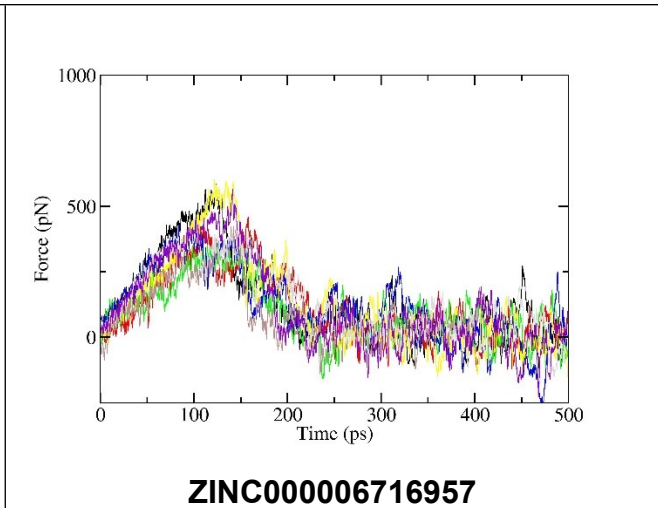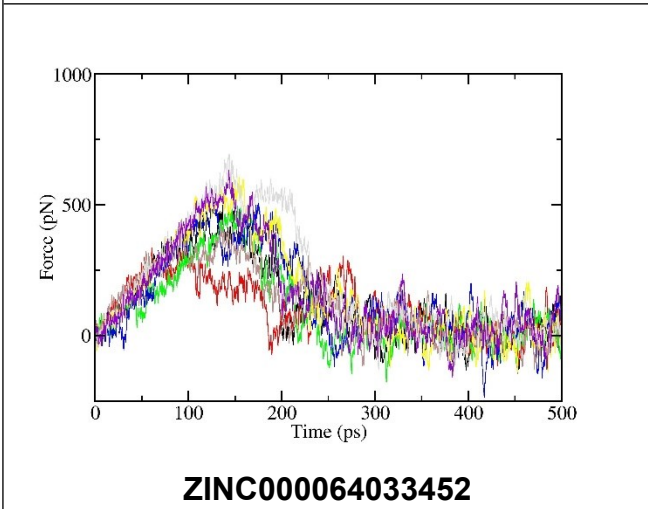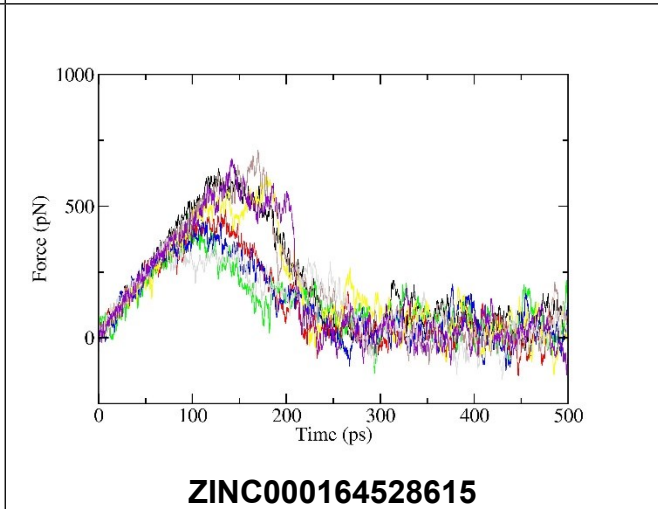



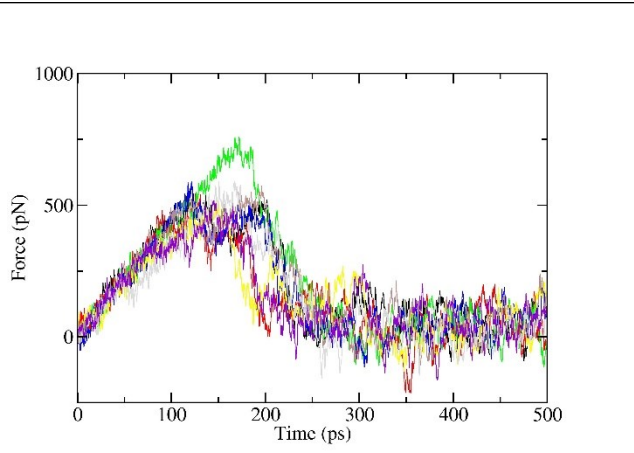

**ZINC000052955754**

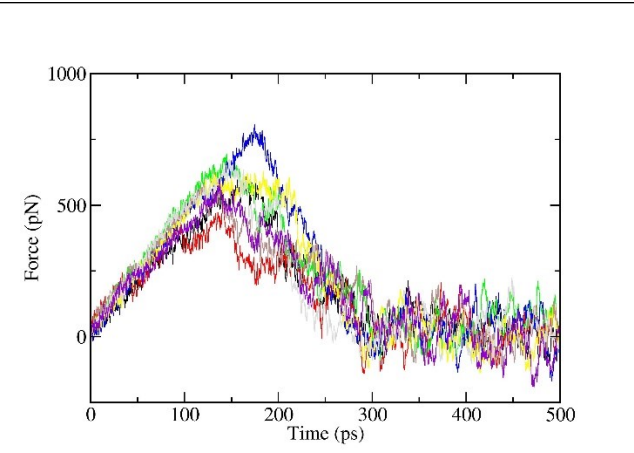

**ZINC000004099009**

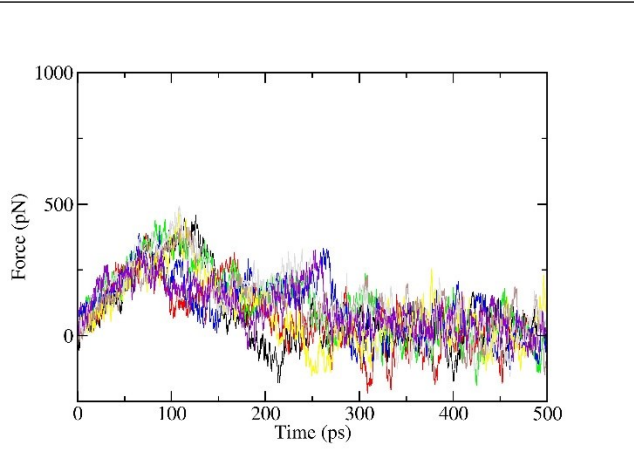

**ZINC000006745272**

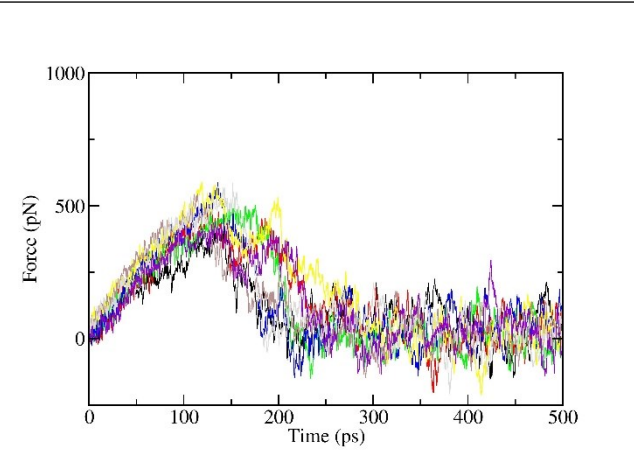

**ZINC000084668739**

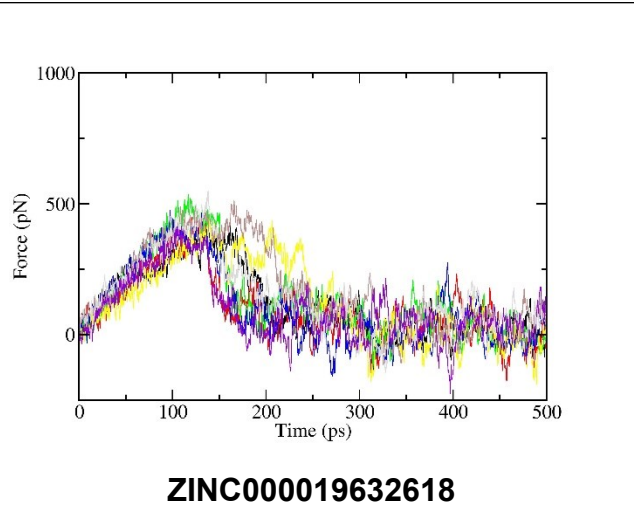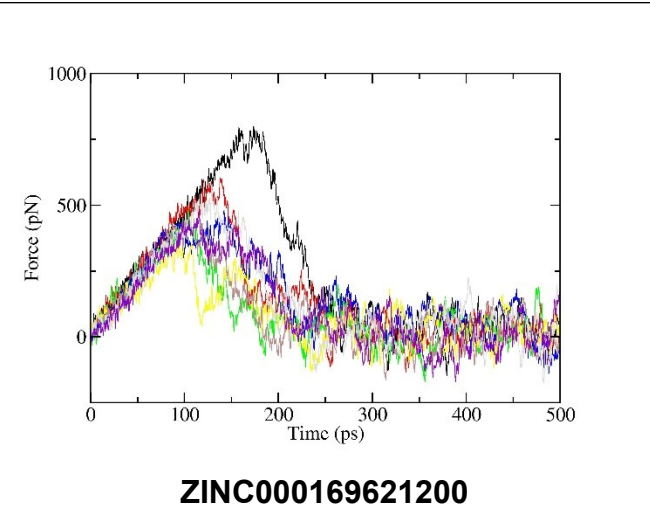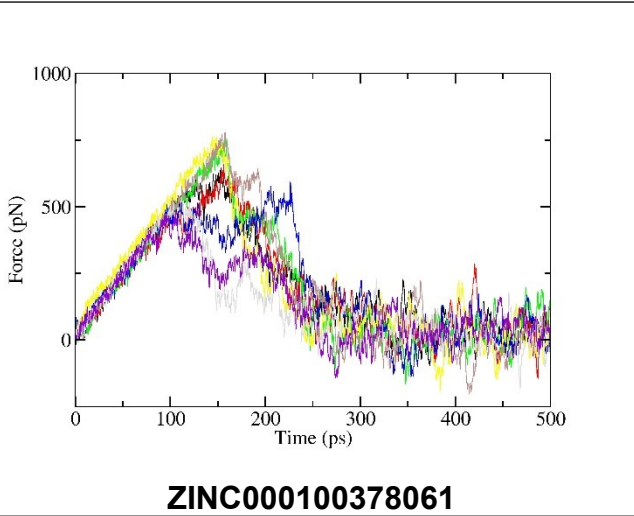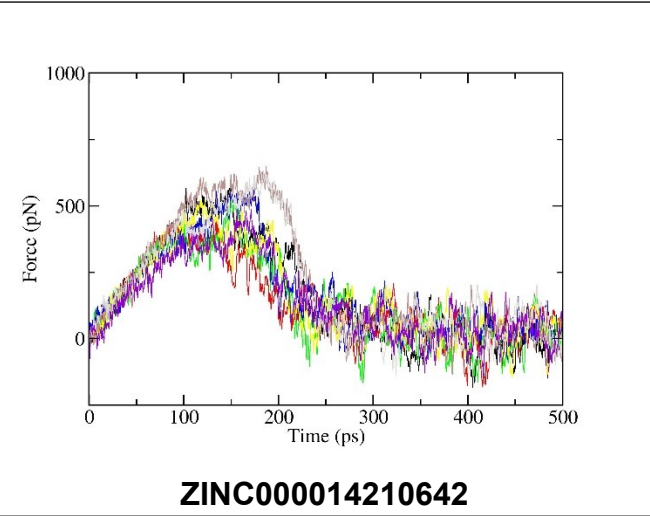

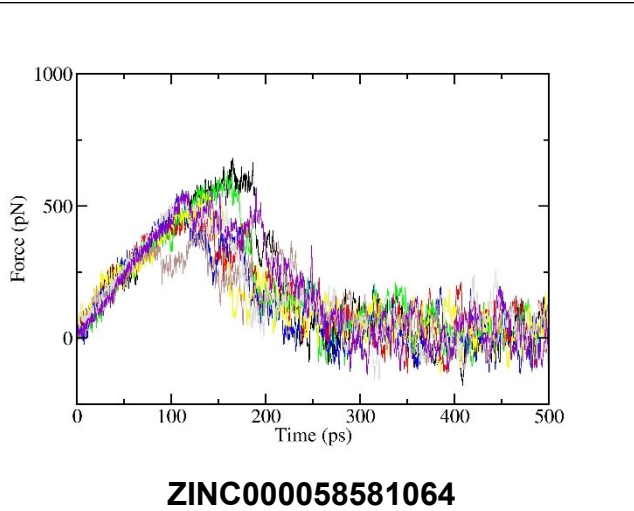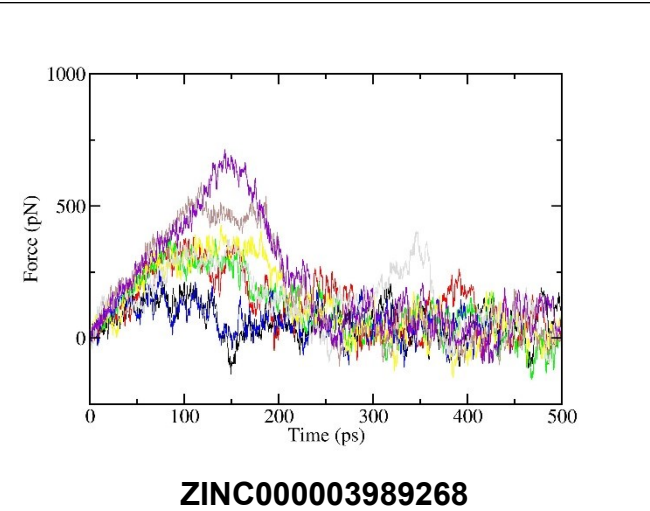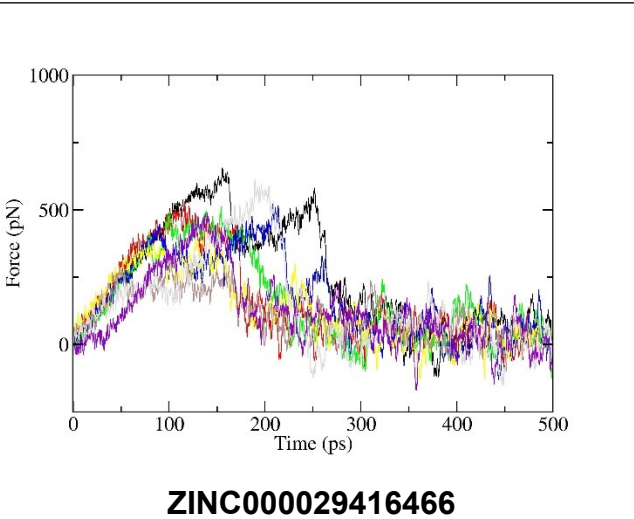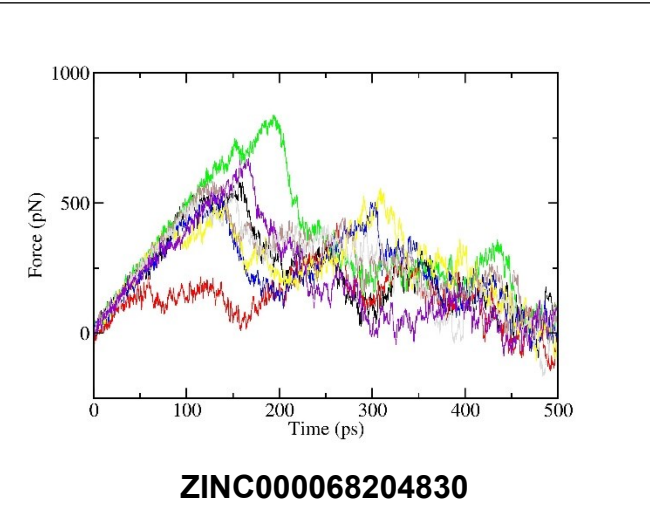

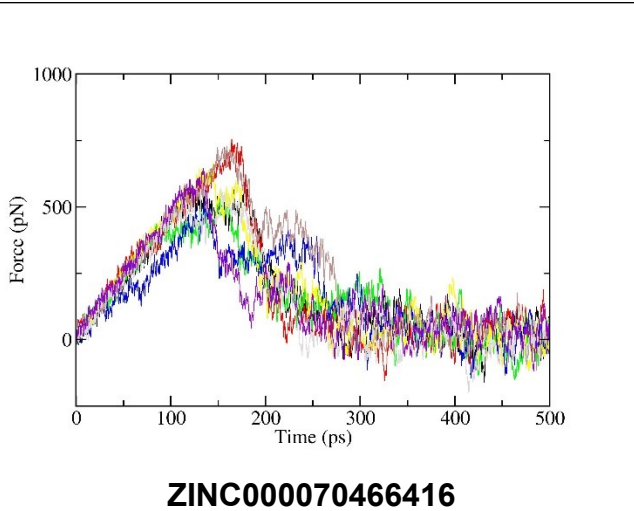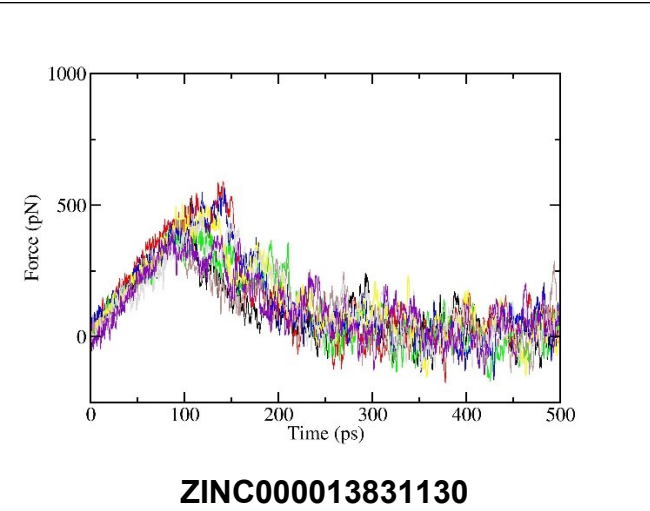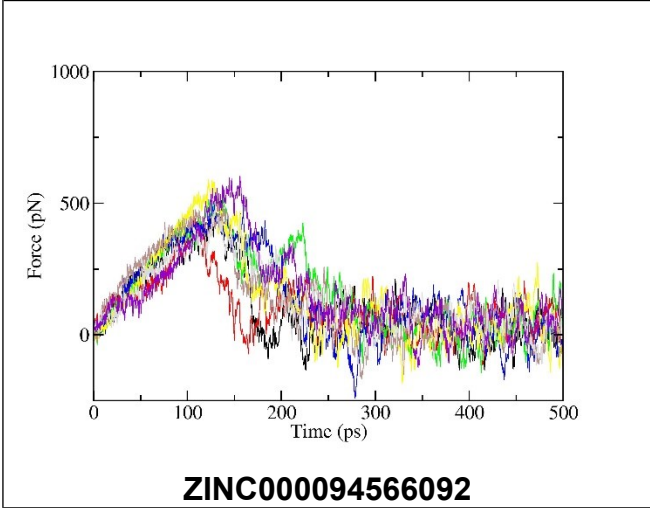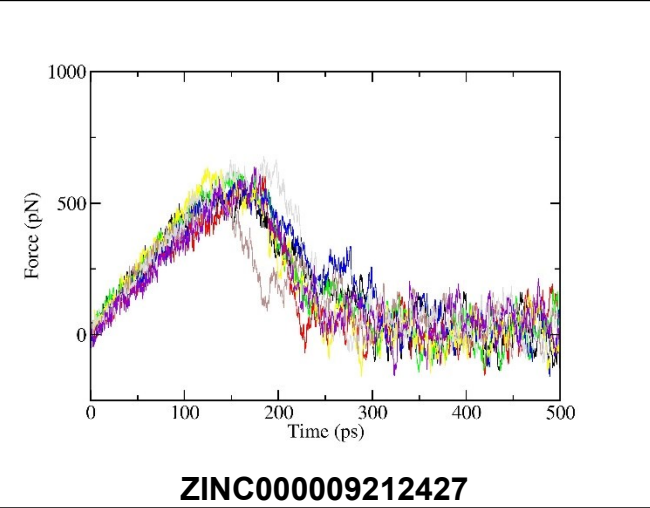

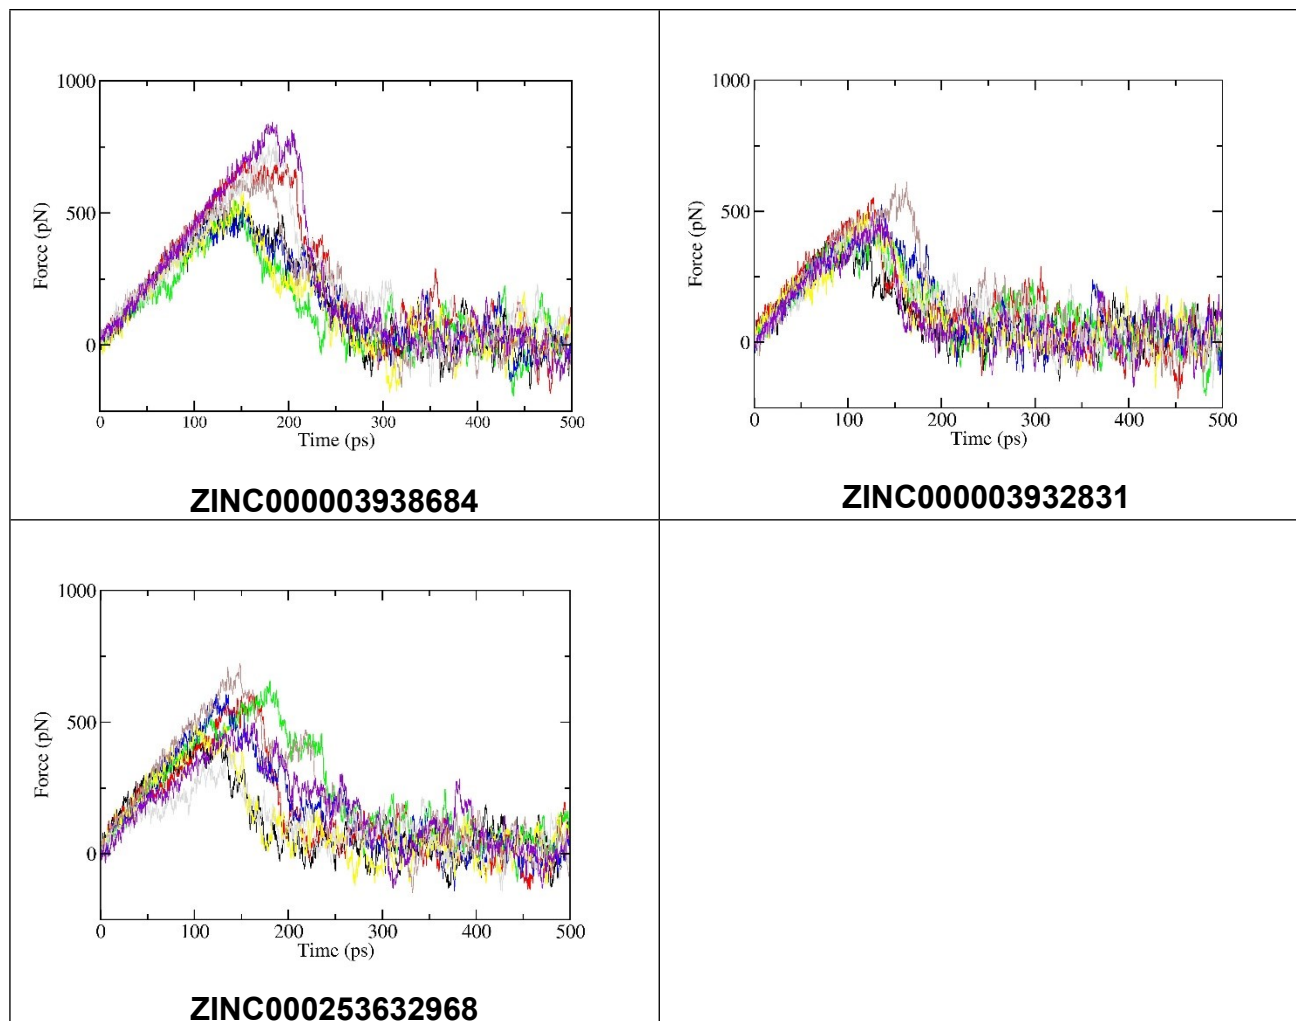

**Figure S3.** The pulling force in time-dependence over 8 independent SMD trajectories. Each interaction force is reported every 0.02 ps and is the 8 independent trajectories average value. Each interaction work is reported every 10 ps and is the 8 independent trajectories average value. The figure was prepared using PyMOL 1.3 open source.

## References

1. S. Salentin, S. Schreiber, V. J. Haupt, M. F. Adasme and M. Schroeder, *Nucleic acids research*, 2015, **43**, W443-W447.
